# Supplementary material for: Endometriosis-Associated Cardiovascular Remodeling: Mechanistic Insights and the Modulatory Role of Flavonoids
Source: Research Square preprint supplement (doi:10.21203/rs.3.rs-7789511/v1), 2025-10-30
Supplement: Supplementary file 1 [file c30bdbef5386db02fa7fdadd.pdf]

# Study design

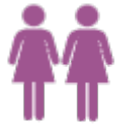

## Participants

Discovery cohort: 235,611 women from UK Biobank  
Validation cohort: 1,224 women from Hospital-based cohort (laparoscopically confirmed)

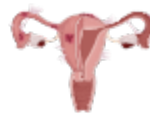

**Exposure**  
**Endometriosis**

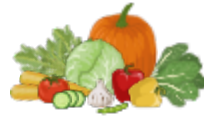

**Dietary flavonoid intake**

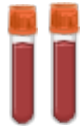

## Peripheral biomarkers

- Metabolism
- Inflammation
- Oxidative stress
- Hormone

Follow-up

Median: 13.0 years

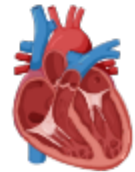

**CMR imaging:** cardiac structure and function

# Main finding

## 1. Endometriosis and CMR phenotypes

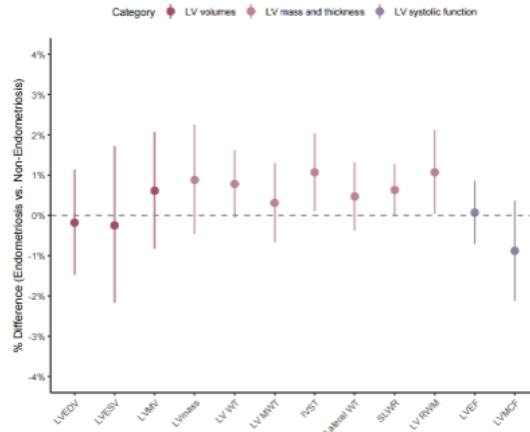

## 2. Potential mechanisms

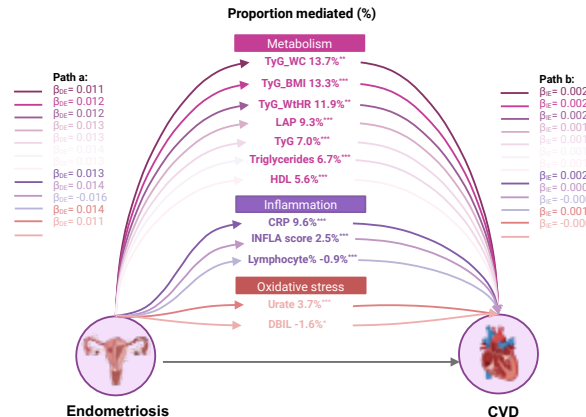

## 3. Flavonoids–endometriosis interplay in CVD risk

| Total flavones                  | Participants without endometriosis | Reference        | Reference |
|---------------------------------|------------------------------------|------------------|-----------|
| High intake                     | Reference                          | Reference        | Reference |
| Medium intake                   | 0.99 (0.94–1.04)                   | 0.94 (0.87–1.02) |           |
| Low intake                      | 1.10 (1.04–1.16)                   | 1.03 (0.95–1.11) |           |
| Participants with endometriosis |                                    |                  |           |
| High intake                     | 1.07 (0.84–1.38)                   | 1.16 (0.82–1.64) |           |
| Medium intake                   | 1.10 (0.85–1.42)                   | 1.41 (1.03–1.92) |           |
| Low intake                      | 1.36 (1.10–1.68)                   | 1.17 (0.85–1.61) |           |
| Total flavanones                | Participants without endometriosis | Reference        | Reference |
| High intake                     | Reference                          | Reference        | Reference |
| Medium intake                   | 0.99 (0.94–1.04)                   | 1.00 (0.93–1.06) |           |
| Low intake                      | 1.10 (1.05–1.14)                   | 1.11 (1.03–1.20) |           |
| Participants with endometriosis |                                    |                  |           |
| High intake                     | 1.07 (0.84–1.38)                   | 1.08 (0.73–1.52) |           |
| Medium intake                   | 1.10 (0.85–1.42)                   | 1.60 (0.91–1.80) |           |
| Low intake                      | 1.36 (1.10–1.68)                   | 1.53 (1.15–2.04) |           |

## Findings

- **Endometriosis** linked to higher CVD risk (+18% overall; +25% CHD).
- **CMR** reveals subtle structural abnormalities (↑ septal thickness, wall motion changes).
- **Pathways:** metabolic, inflammatory, oxidative stress partly mediate risk.
- **Flavonoids**—high flavone/flavanone intake attenuates this associations.
