# Supplementary material for: Endometriosis-Associated Cardiovascular Remodeling: Mechanistic Insights and the Modulatory Role of Flavonoids
Source: Research Square preprint supplement (doi:10.21203/rs.3.rs-7789511/v1), 2025-10-30
Supplement: Supplementary file 1 [file f6abef7c6d9ebb0f09d95833.docx]

**Supplementary Materials**

# Supplementary Methods

Table S1. Disease codes for CVD and subsequent CVD.

Table S2. List of self-reported UKBB codes used to define covariates in UK Biobank.

Table S3. Parameters of dietary composition used for OBS/DOBS/LOBS construction.

Figure S1. Flowchart of participant selection for the hospital-based validation cohort.

**Supplementary Results**

Figure S2. Association between endometriosis and CVD after excluding participants with <5 years of follow-up.

**Figure S3.** Association between endometriosis and CVD when restricting cases to ICD-10–defined endometriosis.

Figure S4. Association between endometriosis and CVD after further adjustment for menopausal status.

**Figure S5.** Associations of endometriosis with incident cardiovascular outcomes after excluding women with prior hysterectomy or oophorectomy.

Figure S6. Hazard ratios for cardiovascular disease in women with laparoscopically confirmed endometriosis compared with matched controls in the hospital-based cohort.

**Figure S7.** Subgroup analyses of the association between endometriosis and incident cardiovascular disease.

**Figure S8.** Subgroup analyses of the association between endometriosis and incident coronary heart disease.

Table S4.Baseline characteristics of women with and without laparoscopically confirmed endometriosis in the hospital-based cohort (n=1224).

Table S5. Associations between endometriosis and CMR heart structure and function metrics.

Table S6. Associations of endometriosis with metabolic, inflammatory, oxidative stress, and hormonal biomarkers by linear regression model.

Table S7. Associations of metabolic, inflammatory, oxidative stress, and hormonal biomarkers with CVD risk by Cox regression model.

Table S8. Associations of metabolic, inflammatory, oxidative stress, and hormonal biomarkers with CHD risk by Cox regression model.

Table S9. Mediating proportion of metabolic disorders on the association between endometriosis and CVD.

Table S10. Mediating proportion of metabolic disorders on the association between endometriosis and CHD.

Table S11. Descriptive statistics for intake of flavonoids in all participants (n = 103,108).

Table S12. Joint associations between endometriosis and flavonoid categories with CVD.

Table S13. Joint associations between endometriosis and flavonoid categories with CHD.

# Supplementary Methods

## CMR outcomes

Metrics were indexed to body surface area (BSA) and, given BSA's limitations in obesity, also to height^1.7 due to ~30% of the UKB cohort having a BMI >30 kg/m². Post-processed parameters included left ventricular end-diastolic volume (LVEDV), end-systolic volume (LVESV), stroke volume (SV), ejection fraction (LVEF), and myocardial mass. Relative wall mass was defined as LV mass/LVEDV. Myocardial volume (MV) was derived assuming a myocardial density of 1.05 g/mL, and myocardial contraction fraction (MCF) as SV/MV. Indexed volumes and mass yielded LVEDVi, LVESVi, and LV mass index (LVmassi). Wall thickness (WT) across the 16 American Heart Association (AHA) segments was measured at end-diastole using a Convolutional Neural Network (CNN) model. Mean and maximal WT were calculated, along with interventricular septal WT (segments 2, 3, 8, 9, 14), lateral wall WT (segments 5, 6, 11, 12, 16), and the septal-to-lateral wall thickness ratio (SLWR); SLWR >1.3 or <0.7 was considered abnormal.

LV deformation was evaluated using circumferential, radial, and longitudinal strains, aligned with myocardial fiber architecture, and indexed to LV mass. Strains were obtained from a 3D myocardial model, with regions categorized as basal (segments 1–6), mid (7–12), and apical (13–16). Mid/apical longitudinal strain data were not available during analysis. Lower absolute strain values indicated impaired myocardial function.

## Peripheral biomarkers

Biological samples from participants were collected at the assessment center using 4 mL EDTA vacuum containers. These samples were subsequently stored at 4°C and transported overnight to the UK Biocentre in Stockport, UK, utilizing a temperature-controlled container to ensure sample integrity. Hematological analyses of whole blood were conducted using Beckman Coulter LH750 System hematology analyzers to quantify hemocytes. At baseline, twenty biochemical markers in serum were selected for assay using immunoassay analyzers (DiaSorin Liaison XL and Beckman Coulter DXI800) and clinical chemistry analyzers (Beckman Coulter AU5800 and Siemens Advia1800).

For further analysis, we categorized blood biomarkers into four groups: metabolic disorder, inflammation, hormones, and oxidative stress. The metabolic biomarkers included triglycerides (TG), total bilirubin (TBIL), low-density lipoprotein cholesterol (LDL-C), high-density lipoprotein cholesterol (HDL-C), fasting plasma glucose (FPG), total cholesterol (TC), the triglyceride-glucose index (TyG), TyG-body mass index (TyG-BMI), TyG-waist circumference (TyG-WC), waist-to-height ratio (WtHR), and lipid accumulation product (LAP). Composite indices were calculated based on established formulas: TyG = ln [triglycerides (mg/dL) × fasting blood glucose (mg/dL)/2], TyG-BMI = TyG × BMI (kg/m²), TyG-WtHR = TyG × waist-to-height ratio, TyG-WC = TyG × waist circumference (cm), LAP = (waist circumference [cm] – 58) × triglycerides (mmol/L). For inflammatory biomarkers, except for single indicators, i.e., C-reactive protein (CRP), counts and percentages of leukocyte, lymphocyte, monocyte, neutrophil, and platelet, five systemic inflammation biomarkers were considered and calculated as follows: neutrophil-to-lymphocyte ratio (NLR) = neutrophils/lymphocytes, monocyte-to-lymphocyte ratio (MLR) = lymphocytes/monocytes, platelet to-lymphocyte ratio (PLR) = platelets/lymphocytes, systemic immune-inflammation index (SII) = (neutrophils * platelets)/lymphocytes, systemic inflammation response index (SIRI) = (neutrophils * monocyte)/lymphocytes, and the low-grade inflammation score (INFLA-score). The INFLA-score integrates four key inflammatory biomarkers, including WBC count, PLT count, CRP, and NLR. Each biomarker was categorized into deciles, and scored from –4 to +4 based on its distribution: values in the lowest four deciles received scores from –4 to –1, while values in the highest four deciles were assigned scores from +1 to +4. The INFLA-score was then calculated by summing the scores of the four biomarkers, yielding a total score ranging from –16 to +16, with higher values indicating greater levels of low-grade inflammation. Hormones consisted of sex hormone binding globulin (SHBG). The urate, bilirubin, albumin, and oxidative balance score (OBS) as alternative biomarkers of oxidative stress, were also included in our analysis.

The Dietary Oxidative Balance Score (DOBS) was calculated using intake scores of predefined pro/antioxidant dietary factors, including 14 antioxidants and 2 pro-oxidants [1]. Nutrient intake was divided into tertiles, with antioxidants scored 1 to 3 as intake increased, and pro-oxidants scored the opposite (Table S2) [2, 3]. For example, total fat, a pro-oxidant, scored 3 for intake ≤58.82 g/d, 2 for 58.83–81.67 g/d, and 1 for >81.68 g/d. Other components included dietary fiber, carotene, vitamins B2, B6, B12, C, E, niacin, folic acid, calcium, magnesium, zinc, copper, selenium, and iron. The total score of these components formed the DOBS. Similarly, the Lifestyle OBS (LOBS) was calculated using scores from four lifestyle factors affecting antioxidant/pro-oxidant activity [4]. LOBS was calculated using scores from four lifestyle factors affecting antioxidant/pro-oxidant activity: one antioxidant and three pro-oxidant factors. Alcohol intake was scored as 3 for non-drinkers, 2 for non-heavy drinkers, and 1 for heavy drinkers. The other factors included BMI, smoking status, and physical activity level. The total of these scores formed the LOBS, which, when added to DOBS, gave the participant's overall OBS.

| **Table S1. Disease codes for CVD and subsequent CVD.** | | |
| --- | --- | --- |
| **Diseases** | **ICD10 (UKB data field 41270)** | **Self-reported (UKB data field 20002)** |
| CVD | I20, I21, I22, I23, I24, I25, I48, I49, I50, I60, I61, I62, I63, I64, I69 | 1074, 1075, 1076, 1077, 1081,1082, 1086 |
| CHD | I20, I21, I22, I23 | 1074, 1075 |
| Myocardial infarction | I21, I22, I23 | 1075 |
| Atrial fibrillation | I48 | - |
| Heart failure | I50 | 1076 |
| Stroke | I60, I61, I62, I63, I64, I69 | 1491, 1583, 1081, 1082,1086 |

**Table S2. List of self-reported UKBB codes used to define covariates in UK Biobank.**

| **Covariates** | **Categorizations** | **UKB Code** | **Descriptions** |
| --- | --- | --- | --- |
| Age (years) | Age at baseline | 21022 | Date attended baseline assessment minus date of birth |
| Race/Ethnicity | White  Asian or Asian British  Other or mixed | 21000 | Touchscreen questionnaire: “What is your ethnic group?” |
| Education level of college | Yes No | 6138, 845 | Touchscreen questionnaire:  (i) “which of the following qualifications do you have?”  (ii) “At what age did you complete your continuous full-time education?” |
| Smoking status | Never  Former  Current | 20116 | Touchscreen questionnaire: “how often do you smoke tobacco?” |
| Alcohol consumption | Never  Former  Current: < 1 drinks/week  Current: 1-2 drinks/week  Current: ≥3 drinks/week | 1558 | Touchscreen questionnaire: “About how often do you drink alcohol?” |
| Physical activity | Low  Moderate  High | 22032 | IPAQ activity group |
| Age at menarche (years) | <11  12  13  14  ≥15 | 2714 | Touchscreen question  "How old were you when your periods started? " |
| OC use | Never Ever | 2784 | Touchscreen question  "Have you ever taken the contraceptive pill? (include the 'mini-pill')" |
| HRT use | Never  Ever | 2814 | Touchscreen question  "Have you ever used hormone replacement therapy (HRT)?" |
| Hypertension at baseline | Yes  No | 6153 | Touchscreen question "Do you regularly take any of the following medications? (You can select more than one answer)" |
| Diabetes at baseline | Yes  No | 2443,6153 | Touchscreen question  (i) Has a doctor ever told you that you  have diabetes? (include those who only had diabetes during pregnancy)  (ii) Do you regularly take any of the following medications? (You can select more than one answer)" |
| Aspirin | Yes  No | 20003 | "Treatment/medication code"—self-reported medications captured during a nurse-led verbal interview |
| Medical use (i.e., antihypertensive, lipid-lowering, and glucose-lowering agents) | Yes  No | 6153 | Touchscreen questionnaire: “Medication for cholesterol, blood pressure, and diabetes” |

**Table S3. Parameters of dietary composition used for OBS/DOBS/LOBS construction.**

| OBS components | Property | OBS/DOBS/LOBS score | | |
| --- | --- | --- | --- | --- |
| 1 | 2 | 3 |
| DOBS components |  |  |  |  |
| Dietary fiber (g/d) | Aa | ≤ 14.83 | 14.84-20.19 | > 20.20 |
| Ln-transformed carotene (μg/d) | A | ≤ 7.06 | 7.07-8.07 | > 8.08 |
| Vitamin B2 (mg/d) | A | ≤ 1.63 | 1.64-2.12 | > 2.13 |
| Niacin (mg/d) | A | ≤ 33.46 | 33.47-43.02 | > 43.03 |
| Vitamin B6 (mg/d) | A | ≤ 1.80 | 1.81-2.36 | > 2.37 |
| Folic acid (μg/d) | A | ≤ 264.16 | 264.17-352.39 | > 352.40 |
| Vitamin B12 (μg/d) | A | ≤ 4.68 | 4.69-6.90 | > 6.91 |
| Vitamin C (mg/d) | A | ≤ 82.53 | 82.54-142.01 | > 142.02 |
| Vitamin E (mg/d) | A | ≤ 8.56 | 8.57-12.15 | > 12.16 |
| Calcium (mg/d) | A | ≤ 817.51 | 817.52-1095.43 | > 1095.44 |
| Magnesium (mg/d) | A | ≤ 287.38 | 287.39-362.42 | > 362.43 |
| Zinc (mg/d) | A | ≤ 8.33 | 8.34-11.05 | > 11.06 |
| Copper (mg/d) | A | ≤ 1.13 | 1.14-1.49 | > 1.50 |
| Selenium (μg/d) | A | ≤ 39.92 | 39.93-57.84 | > 57.85 |
| Total fat (g/d) | Pb | > 81.68 | 58.83-81.67 | ≤ 58.82 |
| Iron (mg/d) | P | > 13.70 | 10.58-13.69 | ≤ 10.57 |
| LOBS components |  |  |  |  |
| Ln-transformed physical activity (MET-minute/week) | A | ≤ 6.07 | 6.71-7.74 | > 7.75 |
| Smoking status | P | Current | Previous | Never |
| Body mass index (kg/m2) | P | > 31.72 | 27.08-31.71 | ≤ 27.07 |
| Alcohol (male) (g/d) | P | 0 | 0.01-30.00 | > 30.01 |
| Alcohol (female) (g/d) | P | 0 | 0.01-15.00 | > 15.01 |

aAntioxidant.

bProoxidant.

**Figure S1. Flowchart of participant selection for the hospital-based validation cohort.**


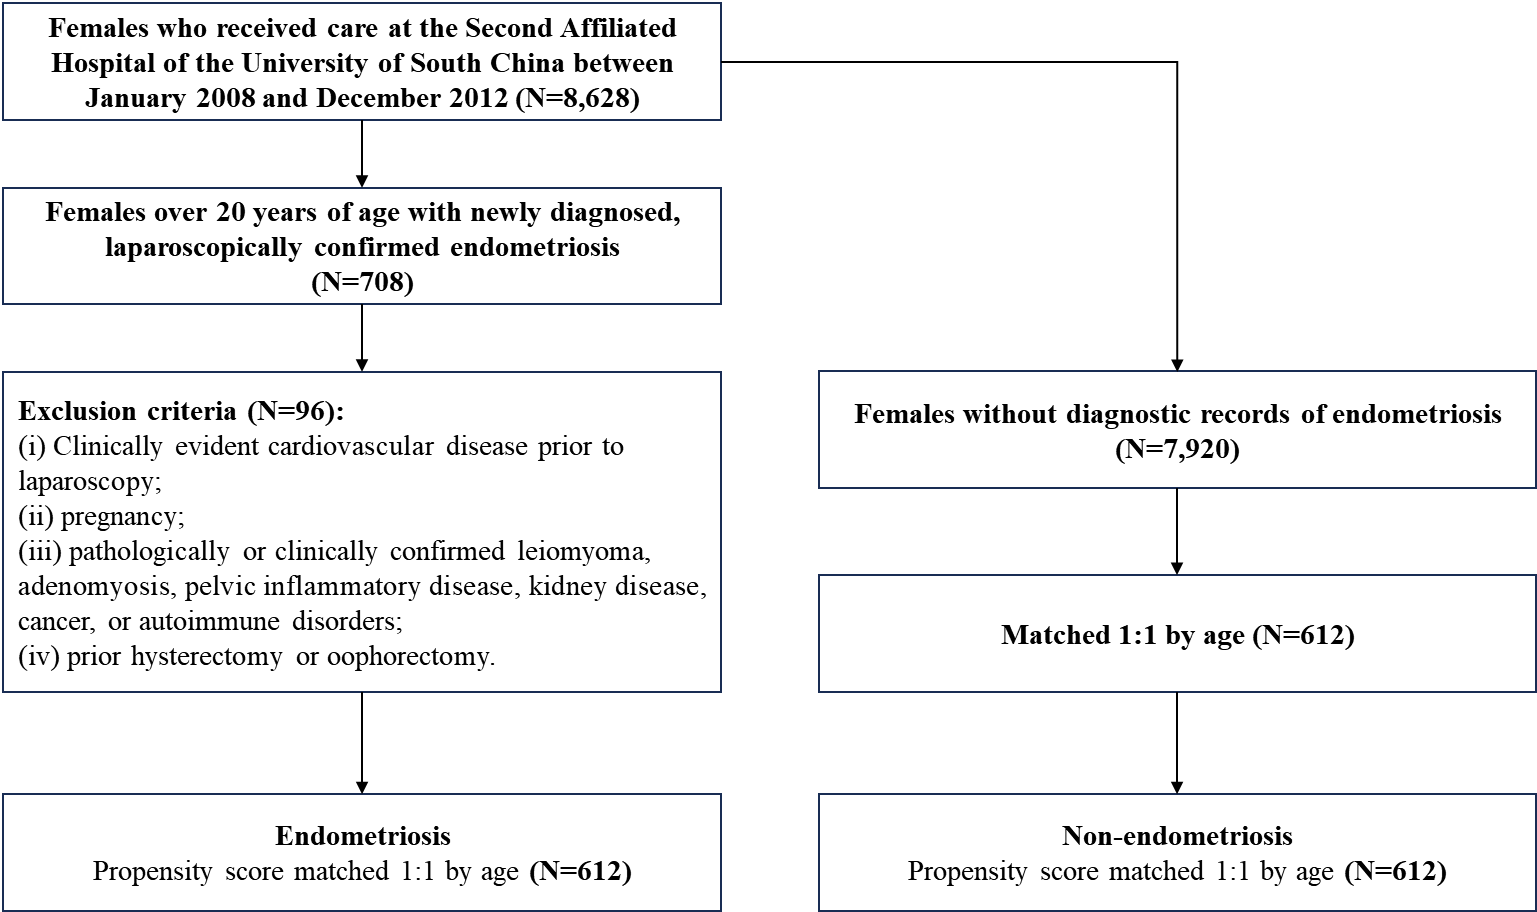


# Supplementary Results

**Figure S2. Association between endometriosis and CVD after excluding participants with <5 years of follow-up.**


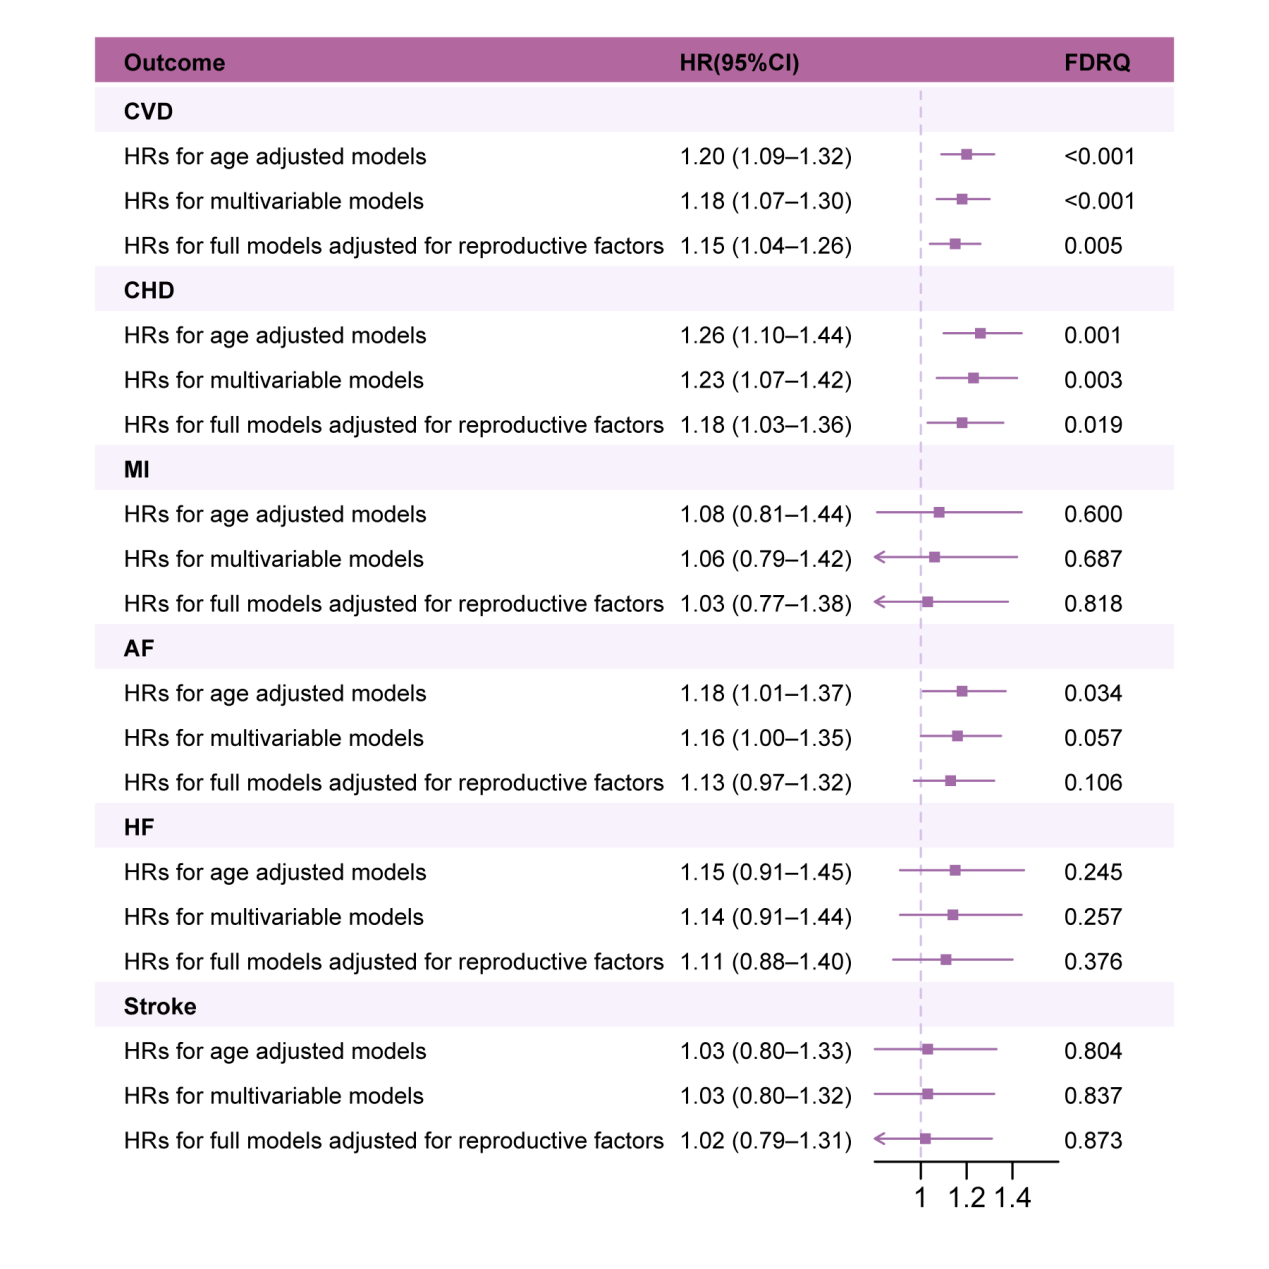


Hazard ratios (HRs) with 95% confidence intervals (CIs) were estimated using Cox proportional hazards models. A stepwise modeling strategy was applied: the primary model was adjusted for age; multivariable models were additionally adjusted for Townsend deprivation index, race/ethnicity, education level (college or above), baseline hypertension, baseline diabetes, smoking status, alcohol consumption, physical activity, and healthy diet score; fully adjusted models were further adjusted for reproductive factors (age at menarche, oral contraceptive use, and hormone replacement therapy use). FDRQ indicates false discovery rate–adjusted Q value.

CVD: cardiovascular disease; CHD: coronary heart disease; MI: myocardial infarction; AF: atrial fibrillation; HF: heart failure; OC: oral contraceptive; HRT: hormone replacement therapy.

**Figure S3. Association between endometriosis and CVD when restricting cases to ICD-10–defined endometriosis.**


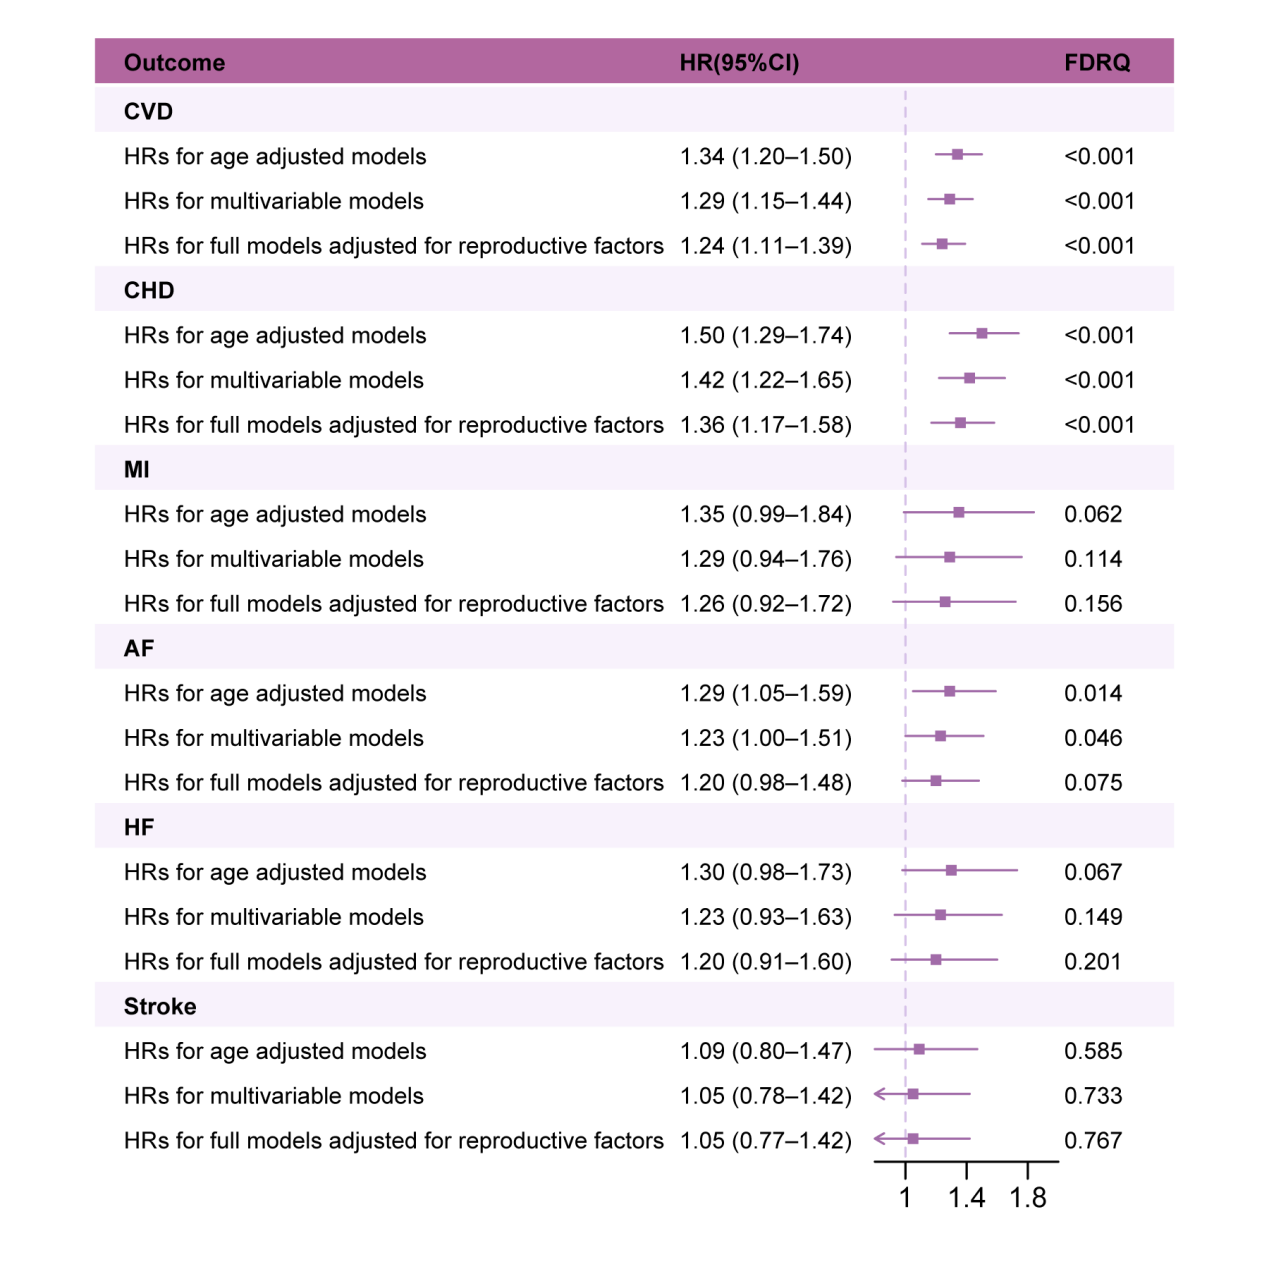


Hazard ratios (HRs) with 95% confidence intervals (CIs) were estimated using Cox proportional hazards models. A stepwise modeling strategy was applied: the primary model was adjusted for age; multivariable models were additionally adjusted for Townsend deprivation index, race/ethnicity, education level (college or above), baseline hypertension, baseline diabetes, smoking status, alcohol consumption, physical activity, and healthy diet score; fully adjusted models were further adjusted for reproductive factors (age at menarche, oral contraceptive use, and hormone replacement therapy use). FDRQ indicates false discovery rate–adjusted Q value.

CVD: cardiovascular disease; CHD: coronary heart disease; MI: myocardial infarction; AF: atrial fibrillation; HF: heart failure; OC: oral contraceptive; HRT: hormone replacement therapy.

**Figure S4. Association between endometriosis and CVD after further adjustment for menopausal status.**


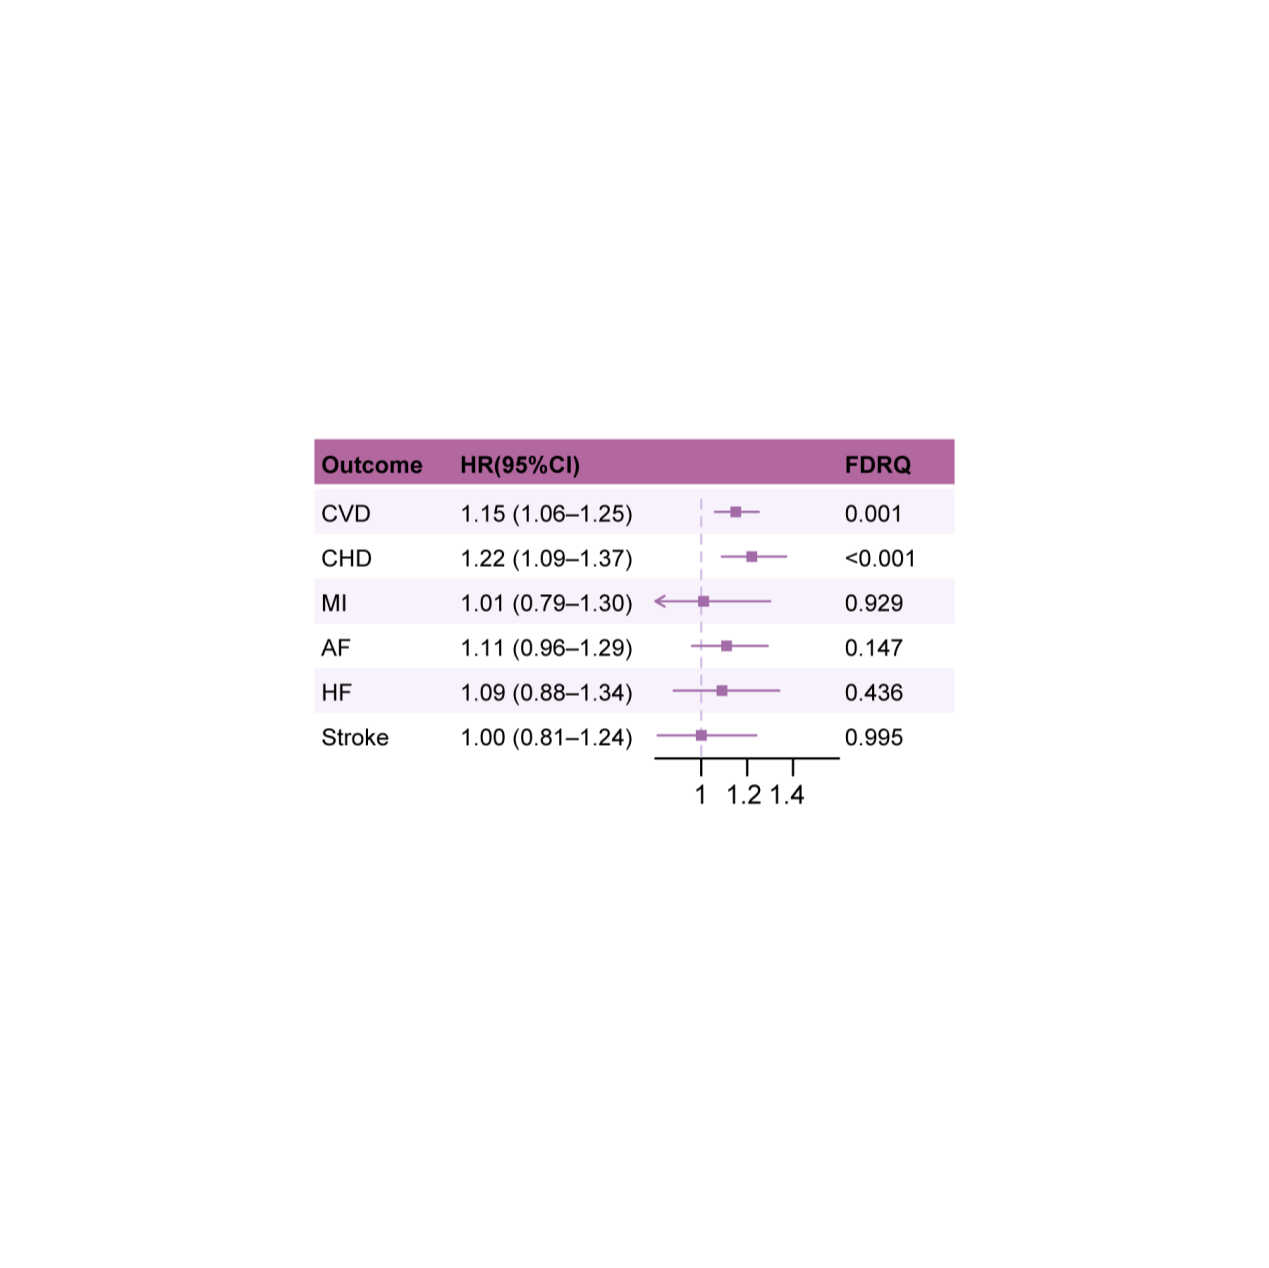


Hazard ratios (HRs) with 95% confidence intervals (CIs) were estimated using Cox proportional hazards models. Model was adjusted for age, Townsend deprivation index, race/ethnicity, education level of college, hypertension at baseline, diabetes at baseline, smoking status, alcohol consumption, physical activity, healthy diet score, age at menarche, oral contraceptive use, and hormone replacement therapy. FDRQ indicates false discovery rate–adjusted Q value.

CVD: cardiovascular disease; CHD: coronary heart disease; MI: myocardial infarction; AF: atrial fibrillation; HF: heart failure; OC: oral contraceptive; HRT: hormone replacement therapy.

**Figure S5. Associations of endometriosis with incident cardiovascular outcomes after excluding women with prior hysterectomy or oophorectomy.**


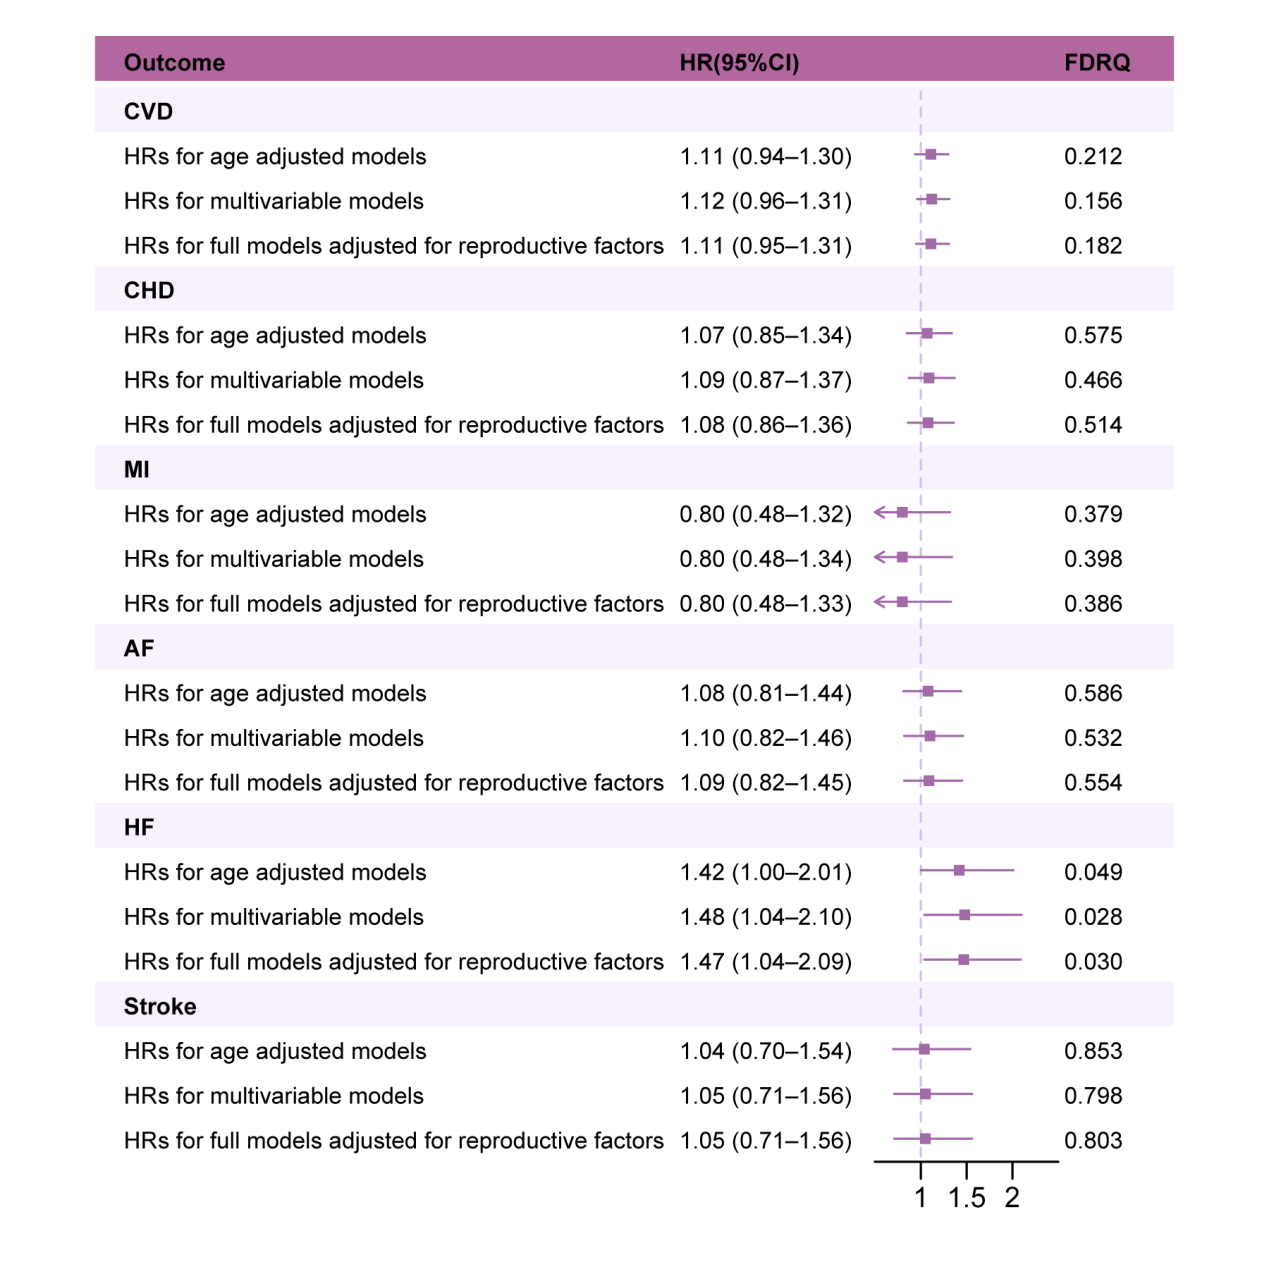


Hazard ratios (HRs) with 95% confidence intervals (CIs) were estimated using Cox proportional hazards models. A stepwise modeling strategy was applied: the primary model was adjusted for age; multivariable models were additionally adjusted for Townsend deprivation index, race/ethnicity, education level (college or above), baseline hypertension, baseline diabetes, smoking status, alcohol consumption, physical activity, and healthy diet score; fully adjusted models were further adjusted for reproductive factors (age at menarche, oral contraceptive use, and hormone replacement therapy use). FDRQ indicates false discovery rate–adjusted Q value.

CVD: cardiovascular disease; CHD: coronary heart disease; MI: myocardial infarction; AF: atrial fibrillation; HF: heart failure; OC: oral contraceptive; HRT: hormone replacement therapy.

**Figure S6. Hazard ratios for cardiovascular disease in women with laparoscopically confirmed endometriosis compared with matched controls in the hospital-based cohort.**


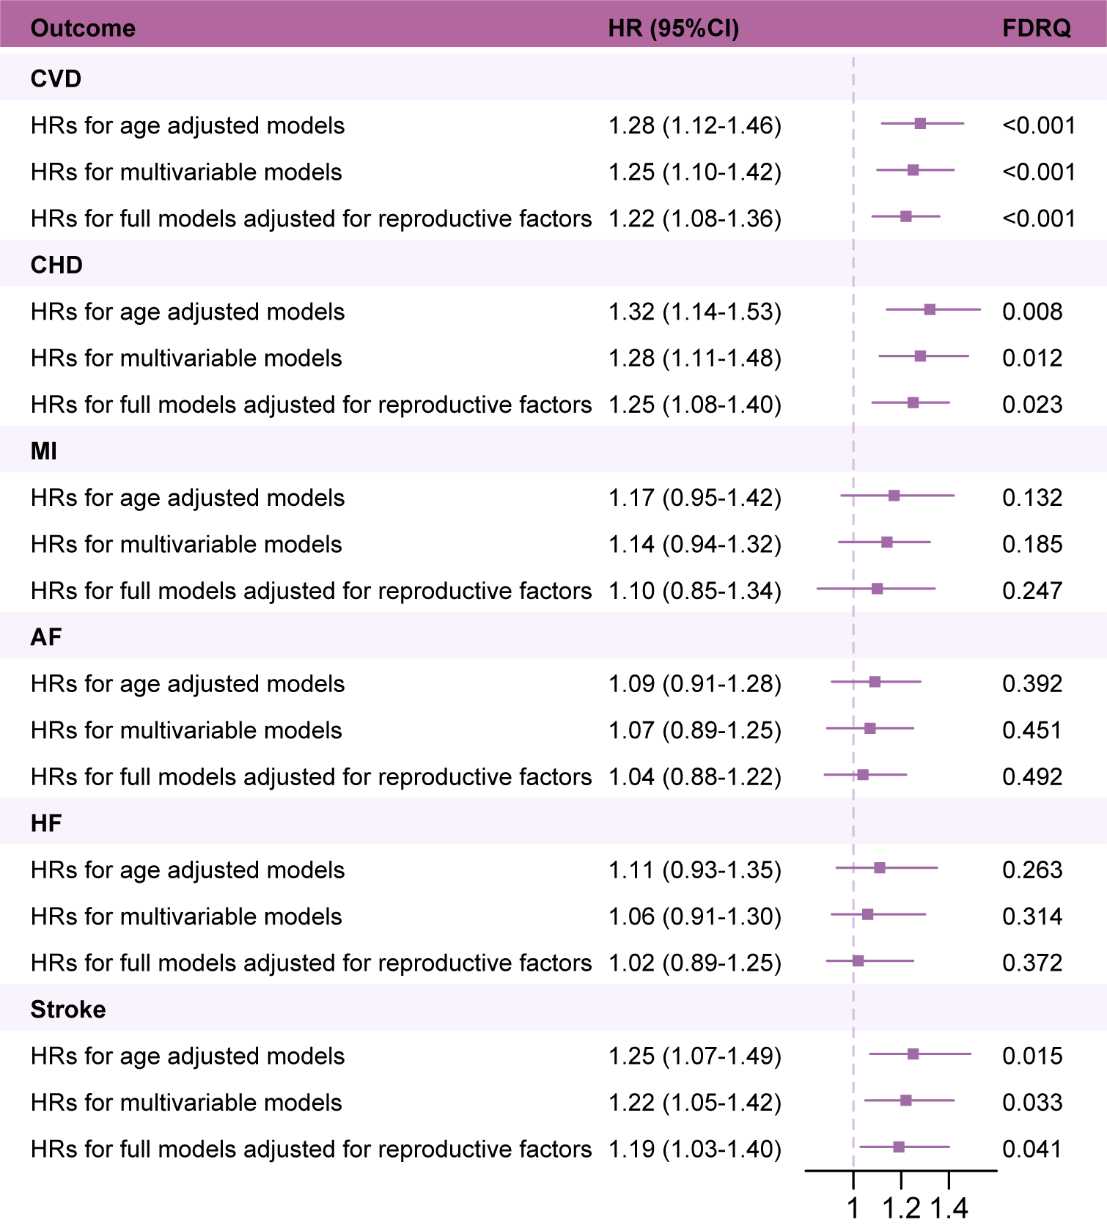


Hazard ratios (HRs) with 95% confidence intervals (CIs) were estimated using Cox proportional hazards models. A stepwise modeling strategy was applied: the primary model was adjusted for age; multivariable models were additionally adjusted for education level (college or above), marital status, baseline hypertension, baseline diabetes, smoking status, alcohol consumption, and physical activity; fully adjusted models were further adjusted for reproductive factors (age at menarche, oral contraceptive use, and hormone replacement therapy use). FDRQ indicates false discovery rate–adjusted Q value.

CVD: cardiovascular disease; CHD: coronary heart disease; MI: myocardial infarction; AF: atrial fibrillation; HF: heart failure; OC: oral contraceptive; HRT: hormone replacement therapy.

**Figure S7. Subgroup analyses of the association between endometriosis and incident cardiovascular disease.**


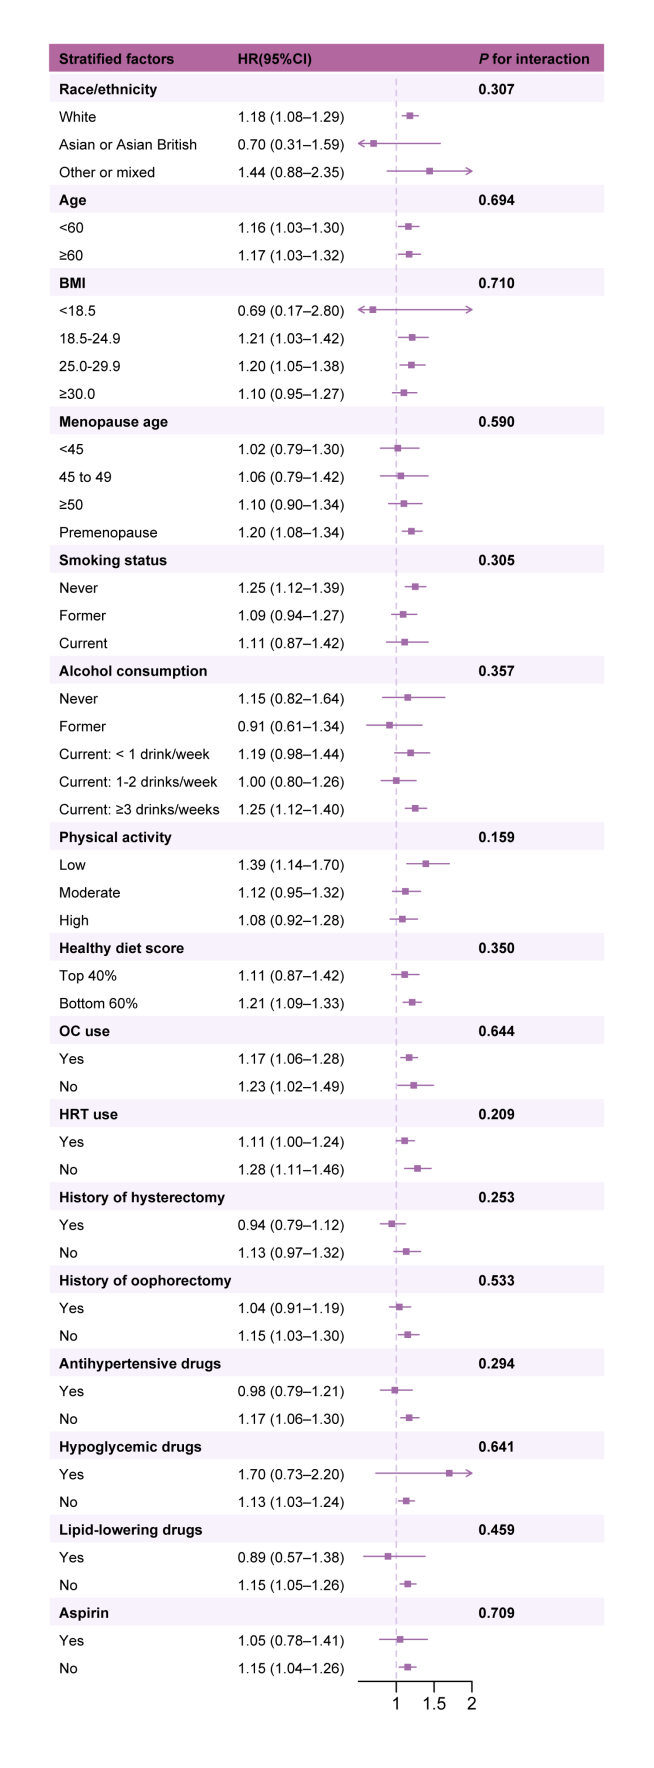


Hazard ratios (HRs) and 95% confidence intervals (CIs) were estimated using Cox proportional hazards models adjusted for age, Townsend deprivation index, race/ethnicity, college education, baseline hypertension, baseline diabetes, smoking status, alcohol consumption, physical activity, and healthy diet score. The dashed line indicates the null value (HR = 1.0). *P* values for interaction were calculated to assess effect modification across subgroups.

**Figure S8. Subgroup analyses of the association between endometriosis and incident coronary heart disease.**


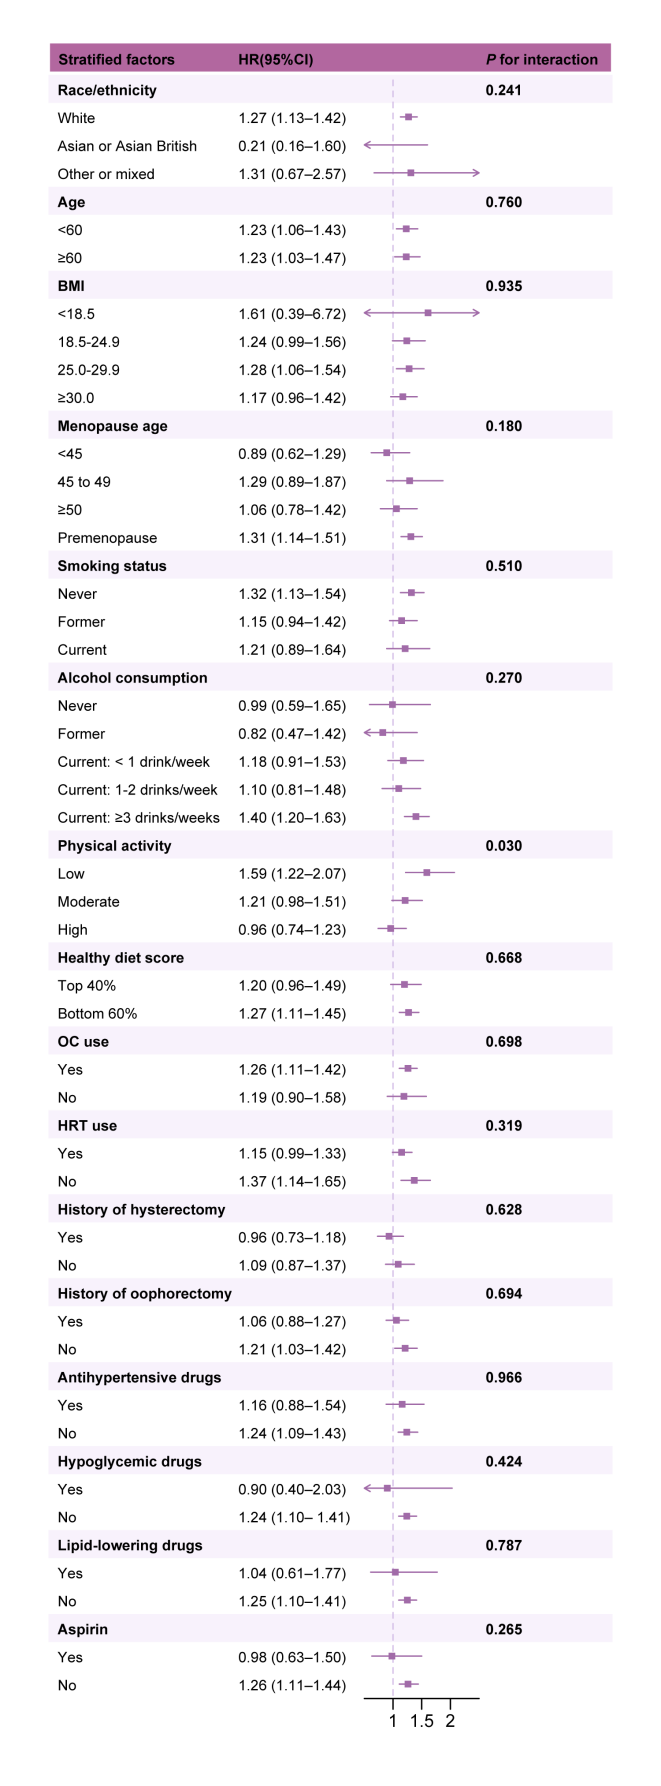


Hazard ratios (HRs) and 95% confidence intervals (CIs) were estimated using Cox proportional hazards models adjusted for age, Townsend deprivation index, race/ethnicity, college education, baseline hypertension, baseline diabetes, smoking status, alcohol consumption, physical activity, and healthy diet score. The dashed line indicates the null value (HR = 1.0). *P* values for interaction were calculated to assess effect modification across subgroups.

| | **Table S4.** Baseline characteristics of women with and without laparoscopically confirmed endometriosis in the hospital-based cohort (n=1224). | | | | | | --- | --- | --- | --- | --- | |  |  | **Participants by laparoscopically confirmed endometriosis status** | |  | | **Characteristics** | **All** | **Without** | **With** | ***P* value** | | Number of women | 1,224 | 612 | 612 |  | | Age (years) | 42.5 ± 7.5 | 42.3 ± 7.2 | 42.3 ± 6.9 | 0.982 | | Education level of college | 447 (36.5) | 245 (40.0) | 202 (32.6) | 0.011 | | Marital status |  |  |  | 0.289 | | Unmarried | 508 (41.5) | 240 (39.2) | 268 (43.8) |  | | Married | 596 (48.7) | 310 (50.7) | 286 (46.7) |  | | Divorced | 120 (9.8) | 62 (10.1) | 58 (9.5) |  | | Smoking status |  |  |  | 0.499 | | Never | 828 (67.6) | 430 (70.3) | 421 (68.8) |  | | Former | 273 (22.3) | 138 (22.5) | 135 (22.1) |  | | Current | 100 (8.2) | 44 (7.2) | 56 (9.2) |  | | Alcohol consumption | |  |  | 0.536 | | Never | 500 (40.8) | 248 (40.5) | 252 (41.2) |  | | Former | 293 (23.9) | 145 (23.7) | 148 (24.2) |  | | Current: < 1 drink/week | 200 (16.3) | 98 (16.0) | 102 (16.7) |  | | Current: 1-2 drinks/week | 150 (12.3) | 74 (12.1) | 76 (12.4) |  | | Current: ≥3 drinks/weeks | 81 (6.6) | 47 (7.7) | 34 (5.6) |  | | Physical activity |  |  |  | <0.001 | | Low: <150 min/week | 564 (46.1) | 264 (43.1) | 300 (49.0) |  | | Moderate: 150-300 min/week | 546 (44.6) | 270 (44.1) | 276 (45.1) |  | | High: >300 min/week | 114 (9.3) | 78 (12.8) | 36 (5.9) |  | | Age at menarche (years) | |  |  | 0.020 | | <12 | 174 (14.2) | 72 (11.8) | 102 (16.7) |  | | 12 | 290 (23.7) | 138 (22.5) | 152 (24.8) |  | | 13 | 316 (25.8) | 168 (27.5) | 148 (24.2) |  | | 14 | 244 (19.9) | 138 (22.5) | 106 (17.3) |  | | ≥15 | 200 (16.3) | 96 (15.7) | 104 (17.0) |  | | OC use | 868 (70.9) | 404 (66.0) | 464 (74.7) | 0.001 | | HRT use | 38 (3.1) | 12 (2.0) | 26 (4.2) | 0.016 | | Hypertension at baseline | 222 (18.1) | 122 (19.9) | 110 (18.0) | 0.416 | | Diabetes at baseline | 40 (3.3) | 24 (3.9) | 16 (2.6) | 0.183 |   **Table S5. Associations between endometriosis and CMR heart structure and function metrics.** | | |
| --- | --- | --- | --- | --- | --- | --- | --- | --- | --- | --- | --- | --- | --- | --- | --- | --- | --- | --- | --- | --- | --- | --- | --- | --- | --- | --- | --- | --- | --- | --- | --- | --- | --- | --- | --- | --- | --- | --- | --- | --- | --- | --- | --- | --- | --- | --- | --- | --- | --- | --- | --- | --- | --- | --- | --- | --- | --- | --- | --- | --- | --- | --- | --- | --- | --- | --- | --- | --- | --- | --- | --- | --- | --- | --- | --- | --- | --- | --- | --- | --- | --- | --- | --- | --- | --- | --- | --- | --- | --- | --- | --- | --- | --- | --- | --- | --- | --- | --- | --- | --- | --- | --- | --- | --- | --- | --- | --- | --- | --- | --- | --- | --- | --- | --- | --- | --- | --- | --- | --- | --- | --- | --- | --- | --- | --- | --- | --- | --- | --- | --- | --- | --- | --- | --- | --- | --- | --- | --- | --- | --- | --- | --- | --- | --- | --- | --- | --- | --- | --- | --- | --- | --- | --- | --- | --- | --- | --- | --- | --- | --- | --- | --- | --- | --- | --- | --- | --- | --- | --- | --- | --- | --- |
| **CMR heart structure and function metrics** | **% difference (95%)** | ***P* value** |
| **LV Volumes** |  |  |
| LVEDVi, mL/m1.7 | -0.18 (-1.48, 1.14) | 0.786 |
| LVESVi, mL/m1.7 | -0.25 (-2.17, 1.72) | 0.802 |
| LV MV, mL | 0.61 (-0.83, 2.07) | 0.410 |
| **LV Structure** |  |  |
| LVmassi, g/m1.7 | 0.88 (-0.46, 2.25) | 0.199 |
| LV 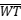 mm | 0.78 (-0.06, 1.62) | **0.069** |
| IVST, mm | 1.07 (0.10, 2.04) | **0.030** |
| LV lateral WT, mm | 0.47 (-0.38, 1.32) | 0.281 |
| SLWR | 0.63 (-0.01, 1.27) | **0.052** |
| LV RWM, g/mL | 1.07 (0.04, 2.12) | **0.042** |
| LV MWT, mm | 0.31 (-0.67, 1.30) | 0.543 |
| **LV Systolic Function** |  |  |
| LVEF, % | 0.07 (-0.71, 0.86) | 0.861 |
| LV MCF | -0.88 (-2.12, 0.37) | 0.167 |
| **Absolute LV circumferential strain index, m1.7/g** |  |  |
| Global | -0.86 (-2.63, 0.96) | 0.350 |
| Basal | -0.87 (-2.56, 0.85) | 0.319 |
| Mid | -0.53 (-2.35, 1.33) | 0.573 |
| Apical | -0.97 (-2.90, 1.01) | 0.332 |
| **Absolute LV radial strain index, m1.7/g** |  |  |
| Global | -0.87 (-2.70, 1.01) | 0.362 |
| Basal | -0.91 (-2.66, 0.87) | 0.108 |
| Mid | -0.22 (-2.16, 1.76) | 0.823 |
| Apical | -1.63 (-3.57, 0.37) | 0.108 |
| **Absolute LV longitudinal strain index, m1.7/g** |  |  |
| Global | -0.65 (-2.42, 1.16) | 0.477 |
| Basal | -0.64 (-2.36, 1.11) | 0.470 |

All reported analyses consisted of generalized linear models with a gamma distribution and log link. The % difference between those exposed and unexposed to higher aircraft noise levels was calculated as 100*(exp β-1). Model was adjusted for age, Townsend deprivation index, race/ethnicity, education level of college, hypertension at baseline, diabetes at baseline, smoking status, alcohol consumption, physical activity, healthy diet score, age at menarche, oral contraceptive use, and hormone replacement therapy.

CMR: cardiovascular magnetic resonance; LV: left ventricular; LVEDVi: left ventricular end-diastolic volume indexed to height1.7; LVESVi: left ventricular end-systolic volume indexed to height1.7; MV: myocardial volume; LVmassi: left ventricular mass indexed to height1.7; WT: wall thickness;
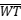
: mean wall thickness; IVST: interventricular septal wall thickness; SLWR: septal-to-lateral wall thickness ratio; RWM: relative wall mass; MWT: maximal wall thickness; LVEF: left ventricular ejection fraction; MCF: myocardial contraction fraction.

| **Table S6. Associations of endometriosis with metabolic, inflammatory, oxidative stress, and hormonal biomarkers by linear regression model.** | | |
| --- | --- | --- |
| **Variables** | **β (95%CI)** | **FDRQ** |
| **Metabolic biomarkers** |  |  |
| Triglycerides | 0.14 (0.11, 0.17) | <0.001 |
| TBIL | -0.05 (-0.08, -0.02) | <0.001 |
| LDL | 0.09 (0.06, 0.11) | <0.001 |
| HDL | -0.07 (-0.09, -0.04) | <0.001 |
| FPG | 0.01 (-0.02, 0.03) | 0.637 |
| Total cholestrol | 0.08 (0.05, 0.10) | <0.001 |
| TyG | 0.13 (0.10, 0.16) | <0.001 |
| TyG-BMI | 0.11 (0.09, 0.14) | <0.001 |
| TyG-WC | 0.11 (0.08, 0.13) | <0.001 |
| TyG-WtHR | 0.10 (0.08, 0.13) | <0.001 |
| LAP | 0.12 (0.09, 0.15) | <0.001 |
| **Inflammation biomarkers** |  |  |
| Monocyte% | -0.03 (-0.05, -0.00) | 0.031 |
| Lymphocyte% | 0.03 (0.00, 0.05) | 0.049 |
| Eosinophil% | -0.02 (-0.05, 0.01) | 0.144 |
| Basophil% | 0.00 (-0.02, 0.03) | 0.745 |
| Monocyte | -0.01 (-0.04, 0.01) | 0.388 |
| Lymphocyte | 0.04 (0.01, 0.06) | 0.006 |
| Basophil | 0.01 (-0.01, 0.04) | 0.313 |
| Neutrophils | 0.01 (-0.02, 0.03) | 0.592 |
| Platelet | -0.03 (-0.05, -0.00) | 0.045 |
| CRP | 0.11 (0.08, 0.13) | <0.001 |
| NLR | -0.02 (-0.05, 0.01) | 0.236 |
| MLR | -0.01 (-0.01, 0.00) | 0.075 |
| PLR | -1.53 (-3.49, 0.44) | 0.128 |
| SII | -8.84 (-18.00, 0.32) | 0.059 |
| SIRI | -0.02 (-0.05, 0.00) | 0.082 |
| INFLA score | 0.22 (0.07, 0.38) | 0.005 |
| **Oxidative stress biomarkers** |  |  |
| Albumin | 0.01 (-0.01, 0.04) | 0.372 |
| Urate | 0.06 (0.04, 0.09) | <0.001 |
| DBIL | -0.06 (-0.09, -0.03) | <0.001 |
| OBS | -0.17 (-0.43, 0.10) | 0.212 |
| **Hormone biomarkers** |  |  |
| SHBG | -0.04 (-0.07, -0.01) | 0.002 |

Model was adjusted for age, Townsend deprivation index, race/ethnicity, education level of college, hypertension at baseline, diabetes at baseline, smoking status, alcohol consumption, physical activity, healthy diet score, age at menarche, oral contraceptive use, and hormone replacement therapy.

TBIL: total bilirubin; FPG: fast plasma glucose; LDL: low-density lipoprotein; HDL: high-density lipoprotein; TyG: triglyceride-glucose index; BMI: body mass Index; WC: waist circumference; WtHR: waist-to-height ratio; LAP: lipid accumulation product; CRP: C-reactive protein; NLR: neutrophil-to-lymphocyte ratio; MLR: monocyte-to-lymphocyte ratio; PLR: platelet-to-lymphocyte ratio; SII: systemic immune-inflammation index; SIRI: systemic inflammation response index; INDLA score: low-grade inflammation score; DBIL: direct bilirubin; OBS: oxidative balance score; SHBG: sex hormone-binding globulin.

| **Table S7. Associations of metabolic, inflammatory, oxidative stress, and hormonal biomarkers with CVD risk by Cox regression model.** | | |
| --- | --- | --- |
| **Variables** | **HR (95%CI)** | **FDRQ** |
| **Metabolic biomarkers** |  |  |
| Triglycerides | 1.08 (1.06, 1.09) | <0.001 |
| TBIL | 1.00 (0.98, 1.01) | 0.611 |
| LDL | 1.01 (0.99, 1.02) | 0.302 |
| HDL | 0.89 (0.88, 0.91) | <0.001 |
| FPG | 1.03 (1.02, 1.05) | <0.001 |
| Total cholestrol | 0.98 (0.97, 1.00) | 0.037 |
| TyG | 1.09 (1.07, 1.10) | <0.001 |
| TyG-BMI | 1.19 (1.18, 1.21) | <0.001 |
| TyG-WC | 1.21 (1.19, 1.23) | <0.001 |
| TyG-WtHR | 1.19 (1.18, 1.21) | <0.001 |
| LAP | 1.13 (1.11, 1.14) | <0.001 |
| **Inflammation biomarkers** |  |  |
| Monocyte% | 1.02 (1.00, 1.03) | 0.011 |
| Lymphocyte% | 0.93 (0.92, 0.94) | <0.001 |
| Eosinophil% | 1.00 (0.99, 1.02) | 0.674 |
| Basophil% | 1.02 (1.01, 1.03) | 0.003 |
| Monocyte | 1.07 (1.06, 1.08) | <0.001 |
| Lymphocyte | 1.00 (0.99, 1.01) | 0.875 |
| Basophil | 1.03 (1.02, 1.04) | <0.001 |
| Neutrophils | 1.10 (1.08, 1.11) | <0.001 |
| Platelet | 0.99 (0.97, 1.00) | 0.053 |
| CRP | 1.16 (1.15, 1.18) | <0.001 |
| NLR | 1.04 (1.04, 1.05) | <0.001 |
| MLR | 1.04 (1.02, 1.06) | <0.001 |
| PLR | 1.00 (1.00, 1.00) | 0.109 |
| SII | 1.00 (1.00, 1.00) | <0.001 |
| SIRI | 1.02 (1.01, 1.02) | <0.001 |
| INFLA score | 1.02 (1.02, 1.02) | <0.001 |
| **Oxidative stress biomarkers** |  |  |
| Albumin | 0.89 (0.88, 0.90) | <0.001 |
| Urate | 1.11 (1.09, 1.12) | <0.001 |
| DBIL | 1.04 (1.02, 1.05) | <0.001 |
| OBS | 1.00 (1.00, 1.01) | 0.174 |
| **Hormone biomarkers** |  |  |
| SHBG | 0.97 (0.95, 0.98) | <0.001 |

Model was adjusted for age, Townsend deprivation index, race/ethnicity, education level of college, hypertension at baseline, diabetes at baseline, smoking status, alcohol consumption, physical activity, healthy diet score, age at menarche, oral contraceptive use, and hormone replacement therapy.

TBIL: total bilirubin; FPG: fast plasma glucose; LDL: low-density lipoprotein; HDL: high-density lipoprotein; TyG: triglyceride-glucose index; BMI: body mass Index; WC: waist circumference; WtHR: waist-to-height ratio; LAP: lipid accumulation product; CRP: C-reactive protein; NLR: neutrophil-to-lymphocyte ratio; MLR: monocyte-to-lymphocyte ratio; PLR: platelet-to-lymphocyte ratio; SII: systemic immune-inflammation index; SIRI: systemic inflammation response index; INDLA score: low-grade inflammation score; DBIL: direct bilirubin; OBS: oxidative balance score; SHBG: sex hormone-binding globulin.

| **Table S8. Associations of metabolic, inflammatory, oxidative stress, and hormonal biomarkers with CHD risk by Cox regression model.** | | |
| --- | --- | --- |
| **Variables** | **HR (95%CI)** | **FDRQ** |
| **Metabolic biomarkers** |  |  |
| Triglycerides | 1.18 (1.16, 1.20) | <0.001 |
| TBIL | 0.95 (0.93, 0.97) | <0.001 |
| LDL | 1.14 (1.12, 1.17) | <0.001 |
| HDL | 0.84 (0.82, 0.86) | <0.001 |
| FPG | 1.05 (1.03, 1.07) | <0.001 |
| Total cholestrol | 1.10 (1.08, 1.12) | <0.001 |
| TyG | 1.20 (1.17, 1.22) | <0.001 |
| TyG-BMI | 1.21 (1.18, 1.23) | <0.001 |
| TyG-WC | 1.24 (1.21, 1.26) | <0.001 |
| TyG-WtHR | 1.25 (1.22, 1.27) | <0.001 |
| LAP | 1.16 (1.14, 1.18) | <0.001 |
| **Inflammation biomarkers** |  |  |
| Monocyte% | 1.00 (0.98, 1.02) | 0.969 |
| Lymphocyte% | 0.95 (0.93, 0.97) | <0.001 |
| Eosinophil% | 1.00 (0.99, 1.02) | 0.642 |
| Basophil% | 1.01 (0.99, 1.03) | 0.181 |
| Monocyte | 1.07 (1.05, 1.09) | <0.001 |
| Lymphocyte | 1.03 (1.02, 1.05) | <0.001 |
| Basophil | 1.05 (1.03, 1.07) | <0.001 |
| Neutrophils | 1.11 (1.09, 1.14) | <0.001 |
| Platelet | 1.03 (1.01, 1.05) | 0.007 |
| CRP | 1.18 (1.16, 1.20) | <0.001 |
| NLR | 1.04 (1.03, 1.05) | <0.001 |
| MLR | 1.02 (0.99, 1.06) | 0.199 |
| PLR | 1.00 (1.00, 1.00) | 0.816 |
| SII | 1.00 (1.00, 1.00) | <0.001 |
| SIRI | 1.02 (1.01, 1.02) | <0.001 |
| INFLA score | 1.03 (1.02, 1.03) | <0.001 |
| **Oxidative stress biomarkers** |  |  |
| Albumin | 0.91 (0.89, 0.93) | <0.001 |
| Urate | 1.12 (1.10, 1.14) | <0.001 |
| DBIL | 0.97 (0.94, 0.99) | 0.007 |
| OBS | 1.00 (1.00, 1.01) | 0.308 |
| **Hormone biomarkers** |  |  |
| SHBG | 0.90 (0.89, 0.92) | <0.001 |

Model was adjusted for age, Townsend deprivation index, race/ethnicity, education level of college, hypertension at baseline, diabetes at baseline, smoking status, alcohol consumption, physical activity, healthy diet score, age at menarche, oral contraceptive use, and hormone replacement therapy.

TBIL: total bilirubin; FPG: fast plasma glucose; LDL: low-density lipoprotein; HDL: high-density lipoprotein; TyG: triglyceride-glucose index; BMI: body mass Index; WC: waist circumference; WtHR: waist-to-height ratio; LAP: lipid accumulation product; CRP: C-reactive protein; NLR: neutrophil-to-lymphocyte ratio; MLR: monocyte-to-lymphocyte ratio; PLR: platelet-to-lymphocyte ratio; SII: systemic immune-inflammation index; SIRI: systemic inflammation response index; INDLA score: low-grade inflammation score; DBIL: direct bilirubin; OBS: oxidative balance score; SHBG: sex hormone-binding globulin.

| **Table S9. Mediating proportion of metabolic disorders on the association between endometriosis and CVD.** | | | | | | | | |
| --- | --- | --- | --- | --- | --- | --- | --- | --- |
|  | **Total effect, HR (95%CI)** | ***P* value** | **Direct effect, HR (95%CI)** | ***P* value** | **Indirect effect, HR (95%CI)** | ***P* value** | **Proportion of mediation, %** | ***P* value** |
| **Metabolic biomarkers** | | | | | | | | |
| Triglycerides | 0.015 (0.006, 0.023) | <0.001 | 0.014 (0.005, 0.022) | <0.001 | 0.001 (0.001, 0.001) | <0.001 | 6.7% (4.0%-15.1%) | <0.001 |
| HDL | 0.014 (0.005, 0.023） | <0.001 | 0.013 (0.005, 0.022) | <0.001 | 0.001 (0.000, 0.001) | <0.001 | 4.6% (2.3%-12.7%) | <0.001 |
| Total cholestrol | 0.015 (0.007, 0.023) | <0.001 | 0.015 (0.007, 0.023) | <0.001 | -0.000 (-0.000, 0.000) | 0.140 | -0.5% (-0.9%--0.0%) | 0.140 |
| TyG | 0.014 (0.005, 0.023) | <0.001 | 0.013 (0.004, 0.022) | 0.004 | 0.001 (0.001, 0.001) | <0.001 | 7.0% (4.0%-18.7%) | <0.001 |
| TyG_BMI | 0.014 (0.005, 0.022) | <0.001 | 0.012 (0.003, 0.020) | 0.008 | 0.002 (0.002, 0.003) | <0.001 | 13.3% (7.6%-36.5%) | <0.001 |
| TyG_WC | 0.013 (0.005, 0.022) | 0.004 | 0.011 (0.003, 0.020) | 0.012 | 0.002 (0.002, 0.003) | <0.001 | 13.7% (7.7%-38.0%) | 0.004 |
| TyG_WtHR | 0.014 (0.005, 0.022) | 0.004 | 0.012 (0.003, 0.020) | 0.008 | 0.002 (0.001, 0.002) | <0.001 | 11.9% (6.6%-32.3%) | 0.004 |
| LAP | 0.014 (0.006, 0.022) | <0.001 | 0.013 (0.005, 0.021) | <0.001 | 0.001 (0.001, 0.002) | <0.001 | 9.3% (5.5%-21.9%) | <0.001 |
| **Inflammation biomarkers** | | | | | | | | |
| Monocyte% | 0.016 (0.007, 0.024) | <0.001 | 0.016 (0.007, 0.024) | <0.001 | -0.000 (-0.000, -0.000) | 0.060 | -0.3% (-0.9%--0.0%) | 0.060 |
| Lymphocyte% | 0.015 (0.007, 0.024) | <0.001 | 0.016 (0.007, 0.024) | <0.001 | -0.000 (-0.000, -0.000) | 0.028 | -0.9% (-2.6%--0.1%) | 0.028 |
| Platelet | 0.016 (0.007, 0.024) | <0.001 | 0.016 (0.007, 0.024) | <0.001 | 0.000 (-0.000, 0.000) | 0.996 | -0.0% (-0.2%, 0.3%) | 0.996 |
| CRP | 0.015 (0.007, 0.023) | <0.001 | 0.013 (0.005, 0.022) | <0.001 | 0.002 (0.001, 0.002) | <0.001 | 9.6% (5.7%-21.3%) | <0.001 |
| INFLA score | 0.015 (0.006, 0.023) | <0.001 | 0.014 (0.006, 0.023) | <0.001 | 0.000 (0.000, 0.001) | <0.001 | 2.5% (0.8%-6.6%) | <0.001 |
| **Oxidative stress biomarkers** | | | | | | | | |
| Urate | 0.015 (0.006, 0.023) | <0.001 | 0.014 (0.006, 0.023) | <0.001 | 0.001 (0.000, 0.001) | <0.001 | 3.7% (1.9%-8.8%) | <0.001 |
| DBIL | 0.010 (0.001, 0.020) | 0.028 | 0.011 (0.001, 0.020) | 0.028 | -0.000 (-0.000, -0.000) | <0.001 | -1.6% (-8.2%--0.5%) | 0.028 |
| **Hormone biomarkers** | | | | | | | | |
| SHBG | 0.015 (0.006, 0.024) | <0.001 | 0.015 (0.006, 0.024) | <0.001 | 0.000 (-0.000, 0.000) | 0.304 | 0.2% (-0.2%, 0.8%) | 0.304 |

Model was adjusted for age, Townsend deprivation index, race/ethnicity, education level of college, hypertension at baseline, diabetes at baseline, smoking status, alcohol consumption, physical activity, healthy diet score, age at menarche, oral contraceptive use, and hormone replacement therapy.

HDL: high-density lipoprotein; TyG: triglyceride-glucose index; BMI: body mass Index; WC: waist circumference; WtHR: waist-to-height ratio; LAP: lipid accumulation product; CRP: C-reactive protein; INDLA score: low-grade inflammation score; DBIL: direct bilirubin; SHBG: sex hormone-binding globulin.

| **Table S10. Mediating proportion of metabolic disorders on the association between endometriosis and CHD.** | | | | | | | | |
| --- | --- | --- | --- | --- | --- | --- | --- | --- |
|  | **Total effect, HR (95%CI)** | **P value** | **Direct effect, HR (95%CI)** | ***P* value** | **Indirect effect, HR (95%CI)** | ***P* value** | **Proportion of mediation, %** | ***P* value** |
| **Metabolic biomarkers** | | | | | | | | |
| Triglycerides | 0.010 (0.004, 0.016) | <0.001 | 0.009 (0.003, 0.015) | 0.004 | 0.001 (0.001, 0.002) | <0.001 | 10.8% (6.4%-27.1%) | <0.001 |
| TBIL | 0.010 (0.004, 0.017) | <0.001 | 0.010 (0.004, 0.016) | <0.001 | 0.000 (0.000, 0.000) | <0.001 | 1.1% (0.4%, 3.1%) | <0.001 |
| LDL | 0.010 (0.004, 0.016) | <0.001 | 0.010 (0.003, 0.016) | <0.001 | 0.001 (0.000, 0.001) | <0.001 | 5.3% (2.9%-13.1%) | <0.001 |
| HDL | 0.011 (0.004, 0.017) | <0.001 | 0.010 (0.004, 0.017) | <0.001 | 0.001 (0.000, 0.001) | <0.001 | 4.9% (2.4%-12.8%) | <0.001 |
| Total cholestrol | 0.010 (0.004, 0.017) | <0.001 | 0.010 (0.004, 0.016) | <0.001 | 0.000 (0.000, 0.001) | <0.001 | 3.1% (1.6%-7.7%) | <0.001 |
| TyG | 0.010 (0.004, 0.017) | <0.001 | 0.009 (0.003, 0.016) | <0.001 | 0.001 (0.001, 0.002) | <0.001 | 10.5% (6.1%-27.2%) | <0.001 |
| TyG-BMI | 0.010 (0.004, 0.017) | <0.001 | 0.009 (0.003, 0.016) | 0.004 | 0.001 (0.001, 0.002) | <0.001 | 9.7% (5.5%-25.1%) | <0.001 |
| TyG-WC | 0.010 (0.004, 0.017) | <0.001 | 0.009 (0.003, 0.015) | 0.004 | 0.001 (0.001, 0.002) | <0.001 | 10.4% (5.9%-27.5%) | <0.001 |
| TyG-WtHR | 0.010 (0.004, 0.017) | <0.001 | 0.009 (0.003, 0.015) | 0.004 | 0.001 (0.001, 0.002) | <0.001 | 10.1% (5.6%-26.3%0 | <0.001 |
| CVAI | 0.011 (0.004, 0.017) | <0.001 | 0.009 (0.003, 0.016) | 0.004 | 0.001 (0.001, 0.002) | <0.001 | 10.2% (5.8%-25.4%) | <0.001 |
| LAP | 0.010 (0.004, 0.016) | <0.001 | 0.009 (0.003, 0.015) | 0.004 | 0.001 (0.001, 0.001) | <0.001 | 8.5% (4.9%-22.1%) | <0.001 |
| **Inflammation biomarkers** | | | | | | | | |
| Lymphocyte% | 0.011 (0.005, 0.018) | <0.001 | 0.011 (0.005, 0.018) | <0.001 | 0.000 (-0.000, -0.000) | 0.028 | -0.4% (-1.3%--0.0%) | 0.028 |
| Lymphocyte | 0.011 (0.005, 0.018) | <0.001 | 0.011 (0.005, 0.018) | <0.001 | 0.000 (0.000, 0.000) | <0.001 | 0.4% (0.1%-1.2%) | <0.001 |
| Platelet | 0.012 (0.005, 0.018) | <0.001 | 0.012 (0.005, 0.018) | <0.001 | -0.000 (-0.000, -0.000) | 0.048 | -0.4% (-1.2%--0.0%) | 0.048 |
| CRP | 0.011 (0.004, 0.017) | <0.001 | 0.010 (0.004, 0.016) | <0.001 | 0.001 (0.001, 0.001) | <0.001 | 7.7% (4.4%-17.8%) | <0.001 |
| INFLA score | 0.010 (0.004, 0.017) | <0.001 | 0.010 (0.004, 0.016) | <0.001 | 0.000 (0.000, 0.001) | <0.001 | 2.3% (0.7%-6.3%) | <0.001 |
| **Oxidative stress biomarkers** | | | | | | | | |
| Urate | 0.010 (0.004, 0.017) | <0.001 | 0.010 (0.004, 0.016) | <0.001 | 0.000 (0.000, 0.001) | <0.001 | 3.0% (1.5%-7.5%) | 0.030 |
| DBIL | 0.008 (0.001, 0.015) | 0.024 | 0.008 (0.001, 0.015) | 0.024 | 0.000 (0.000, 0.000) | 0.004 | 1.1% (0.2%, 4.6%) | 0.028 |
| **Hormone biomarkers** | | | | | | | | |
| SHBG | 0.011 (0.005, 0.018) | <0.001 | 0.011 (0.005, 0.018) | <0.001 | 0.000 (-0.000, 0.000) | 0.296 | 0.5% (-0.7%, 2.1%) | 0.296 |

Model was adjusted for age, Townsend deprivation index, race/ethnicity, education level of college, hypertension at baseline, diabetes at baseline, smoking status, alcohol consumption, physical activity, healthy diet score, age at menarche, oral contraceptive use, and hormone replacement therapy.

TBIL: total bilirubin; LDL: low-density lipoprotein; HDL: high-density lipoprotein; TyG: triglyceride-glucose index; BMI: body mass Index; WC: waist circumference; WtHR: waist-to-height ratio; LAP: lipid accumulation product; CRP: C-reactive protein; NLR: neutrophil-to-lymphocyte ratio; MLR: monocyte-to-lymphocyte ratio; PLR: platelet-to-lymphocyte ratio; SII: systemic immune-inflammation index; SIRI: systemic inflammation response index; INDLA score:  low-grade inflammation score; OBS: oxidative balance score; DBIL: direct bilirubin; SHBG: sex hormone-binding globulin.

| **Table S11. Descriptive statistics for intake of flavonoids in all participants (n = 103,108).** | | | | |
| --- | --- | --- | --- | --- |
| **Flavonoids/subclasses,mg/day** | **Mean (SD)** | **Median (P25, P75)** | **Minimum** | **Maximum** |
| **Total flavonoid** | 930.0 (478.0) | 914.0 (567.0, 1264.0) | 0 | 5734.0 |
| **Total Flavan-3-ols** | 603.0 (408.0) | 583.0 (258.0, 928.0) | 0 | 4329.0 |
| (-)-Epicatechin | 37.8 (18.8) | 37.1 (24.5, 49.8) | 0 | 218.0 |
| (-)-Epicatechin 3-gallate | 30.3 (21.0) | 30.0 (11.8, 47.0) | 0 | 235.0 |
| (-)-Epigallocatechin | 64.9 (44.8) | 63.7 (28.8, 95.2) | 0 | 474.0 |
| (-)-Epigallocatechin 3-gallate | 91.7 (63.2) | 92.1 (35.4, 140.0) | 0 | 723.0 |
| (+)-Catechin | 17.6 (9.93) | 16.3 (10.8, 22.4) | 0 | 125.0 |
| (+)-Gallocatechin | 5.4 (4.4) | 4.8 (0.8, 8.71) | 0 | 33.5 |
| **Total flavonols** | 54.2 (25.5) | 53.5 (35.6, 71.2) | 0 | 341.0 |
| Isorhamnetin | 0.8 (0.88) | 0.5 (0.2, 1.1) | 0 | 14.4 |
| Kaempferol | 7.3 (4.0) | 7.3 (4.4, 10.0) | 0 | 54.0 |
| Myricetin | 6.7 (3.4) | 6.5 (4.4, 8.6) | 0 | 55.8 |
| Quercetin | 24.6 (11.8) | 23.9 (16.5, 31.5) | 0 | 199.0 |
| Total flavones | 15.6 (19.7) | 7.0 (1.7, 23.0) | 0 | 231.0 |
| Apigenin | 11.9 (14.4) | 7.0 (0.6, 18.3) | 0 | 145.0 |
| Luteolin | 0.6 (0.5) | 0.5 (0.3, 0.8) | 0 | 8.4 |
| **Total anthocyanidins** | 227.0 (176.0) | 196.0 (101.0, 310.0) | 0 | 3211.0 |
| Cyanidin | 127.0 (129.0) | 97.4 (21.0, 188.0) | 0 | 2292.0 |
| Delphinidin | 25.9 (23.3) | 21.1 (9.5, 35.6) | 0 | 362.0 |
| Malvidin | 37.5 (59.1) | 14.0 (3.0, 46.1) | 0 | 814.0 |
| Pelargonidin | 23.1 (23.8) | 17.1 (5.5, 31.9) | 0 | 394.0 |
| Peonidin | 3.1 (3.9) | 1.6 (0.7, 3.9) | 0 | 53.9 |
| Petunidin | 6.5 (8.1) | 3.2 (0.6, 10.0) | 0 | 97.4 |
| **Total flavanones** | 31.2 (31.2) | 24.6 (4.10, 46.3) | 0 | 705.0 |
| Hesperetin | 10.8 (11.3) | 8.3 (1.0, 16.2) | 0 | 250.0 |
| Naringenin | 15.2 (13.7) | 12.4 (4.4, 21.8) | 0 | 308.0 |

SD, standard deviation.

| **Table S12. Joint associations between endometriosis and flavonoid categories with CVD.** | | | |
| --- | --- | --- | --- |
| **Flavonoid/subclasses** | **Groups** | **HR (95% CI)** | ***P* value** |
| **Total flavonoid** | Participants without endometriosis |  |  |
|  | High | Reference |  |
|  | Medium | 0.95 (0.90–1.00) | 0.043 |
|  | Low | 0.96 (0.91–1.01) | 0.108 |
|  | Participants with endometriosis |  |  |
|  | High | 1.24 (0.99–1.54) | 0.057 |
|  | Medium | 1.09 (0.85–1.40) | 0.486 |
|  | Low | 1.01 (0.79–1.29) | 0.923 |
| **Total Flavan-3-ols** | Participants without endometriosis |  |  |
|  | High | Reference |  |
|  | Medium | 0.97 (0.92, 1.02) | 0.203 |
|  | Low | 0.97 (0.92, 1.02) | 0.189 |
|  | Participants with endometriosis |  |  |
|  | High | 1.26 (1.01, 1.57) | 0.040 |
|  | Medium | 1.08 (0.84, 1.39) | 0.552 |
|  | Low | 1.03 90.81, 1.32) | 0.797 |
| (-)-Epicatechin | Participants without endometriosis |  |  |
|  | High | Reference |  |
|  | Medium | 0.93 (0.89, 0.99) | 0.012 |
|  | Low | 0.97 (0.92, 1.02) | 0.188 |
|  | Participants with endometriosis |  |  |
|  | High | 1.17 (0.93, 1.47) | 0.177 |
|  | Medium | 1.21 (0.96, 1.52) | 0.111 |
|  | Low | 0.97 (0.75, 1.24) | 0.794 |
| (-)-Epicatechin 3-gallate | Participants without endometriosis |  |  |
|  | High | Reference |  |
|  | Medium | 0.98 (0.93, 1.03) | 0.361 |
|  | Low | 0.96 (0.91, 1.01) | 0.115 |
|  | Participants with endometriosis |  |  |
|  | High | 1.22 (0.98, 1.53) | 0.072 |
|  | Medium | 1.12 (0.87, 1.43) | 0.373 |
|  | Low | 1.03 (0.81, 1.32) | 0.799 |
| (-)-Epigallocatechin | Participants without endometriosis |  |  |
|  | High | Reference |  |
|  | Medium | 0.95 (0.90, 1.00) | 0.039 |
|  | Low | 0.95 (0.90, 1.00) | 0.064 |
|  | Participants with endometriosis |  |  |
|  | High | 1.16 (0.93, 1.46) | 0.192 |
|  | Medium | 1.17 (0.92, 1.49) | 0.193 |
|  | Low | 1.01 (0.79, 1.28) | 0.950 |
| (-)-Epigallocatechin 3-gallate | Participants without endometriosis |  |  |
|  | High | Reference |  |
|  | Medium | 0.96 (0.91, 1.01) | 0.098 |
|  | Low | 0.95 (0.90, 1.00) | 0.052 |
|  | Participants with endometriosis |  |  |
|  | High | 1.22 (0.98, 1.52) | 0.081 |
|  | Medium | 1.09 (0.84, 1.40) | 0.517 |
|  | Low | 1.04 (0.81, 1.32) | 0.769 |
| (+)-Catechin | Participants without endometriosis |  |  |
|  | High | Reference |  |
|  | Medium | 0.95 (0.90, 1.01) | 0.076 |
|  | Low | 0.97 (0.92, 1.03) | 0.307 |
|  | Participants with endometriosis |  |  |
|  | High | 1.16 (0.92, 1.47) | 0.215 |
|  | Medium | 1.15 (0.91, 1.46) | 0.236 |
|  | Low | 1.06 (0.84, 1.34) | 0.640 |
| (+)-Gallocatechin | Participants without endometriosis |  |  |
|  | High | Reference |  |
|  | Medium | 0.93 (0.88, 0.98) | 0.008 |
|  | Low | 0.98 (0.93, 1.03) | 0.456 |
|  | Participants with endometriosis |  |  |
|  | High | 1.29 (1.04, 1.61) | 0.023 |
|  | Medium | 0.95 (0.73, 1.24) | 0.697 |
|  | Low | 1.10 (0.87, 1.39) | 0.420 |
| **Total flavonols** | Participants without endometriosis |  |  |
|  | High | Reference |  |
|  | Medium | 0.93 (0.88, 0.98) | 0.008 |
|  | Low | 0.89 (0.85, 94) | <0.001 |
|  | Participants with endometriosis |  |  |
|  | High | 1.19 (0.96, 1.48) | 0.107 |
|  | Medium | 1.02 (0.79, 1.30) | 0.896 |
|  | Low | 1.03 (0.85, 1.32) | 0.825 |
| Isorhamnetin | Participants without endometriosis |  |  |
|  | High | Reference |  |
|  | Medium | 0.96 (0.91, 1.02) | 0.173 |
|  | Low | 1.02 (0.97, 1.08) | 0.418 |
|  | Participants with endometriosis |  |  |
|  | High | 1.30 (1.04, 1.62) | 0.019 |
|  | Medium | 0.88 (0.67, 1.15) | 0.356 |
|  | Low | 1.25 (0.99, 1.57) | 0.055 |
| Kaempferol | Participants without endometriosis |  |  |
|  | High | Reference |  |
|  | Medium | 0.94 (0.89, 0.99) | 0.025 |
|  | Low | 0.93 (0.88, 0.98) | 0.004 |
|  | Participants with endometriosis |  |  |
|  | High | 1.10 (0.88, 1.39) | 0.407 |
|  | Medium | 1.21 (0.95, 1.53) | 0.122 |
|  | Low | 1.01 (0.79, 1.28) | 0.953 |
| Myricetin | Participants without endometriosis |  |  |
|  | High | Reference |  |
|  | Medium | 0.97 (0.92, 1.02) | 0.262 |
|  | Low | 0.91 (0.87, 0.96) | 0.001 |
|  | Participants with endometriosis |  |  |
|  | High | 1.17 (0.93, 1.47) | 0.179 |
|  | Medium | 1.12 (0.89, 1.40) | 0.348 |
|  | Low | 1.03 (0.80, 1.33) | 0.826 |
| Quercetin | Participants without endometriosis |  |  |
|  | High | Reference |  |
|  | Medium | 0.96 (0.91, 1.01) | 0.099 |
|  | Low | 0.92 (0.87, 0.97) | 0.002 |
|  | Participants with endometriosis |  |  |
|  | High | 1.15 (0.92, 1.43) | 0.233 |
|  | Medium | 1.17 (0.92, 1.47) | 0.193 |
|  | Low | 0.99 (0.77, 1.28) | 0.931 |
| **Total flavones** | Participants without endometriosis |  |  |
|  | High | Reference |  |
|  | Medium | 0.99 (0.94, 1.04) | 0.652 |
|  | Low | 1.10 (1.34, 1.16) | 0.001 |
|  | Participants with endometriosis |  |  |
|  | High | 1.07 (0.84, 1.38) | 0.573 |
|  | Medium | 1.10 (0.85, 1.42) | 0.471 |
|  | Low | 1.36 (1.10, 1.68) | 0.005 |
| Apigenin | Participants without endometriosis |  |  |
|  | High | Reference |  |
|  | Medium | 0.92 (0.87, 0.97) | 0.002 |
|  | Low | 0.97 (0.92, 1.02) | 0.201 |
|  | Participants with endometriosis |  |  |
|  | High | 1.03 (0.80, 1.31) | 0.834 |
|  | Medium | 1.24 (0.99, 1.56) | 0.059 |
|  | Low | 1.06 (0.83, 1.34) | 0.661 |
| Luteolin | Participants without endometriosis |  |  |
|  | High | Reference |  |
|  | Medium | 1.01 (0.96, 1.07) | 0.593 |
|  | Low | 1.03 (0.98, 1.09) | 0.225 |
|  | Participants with endometriosis |  |  |
|  | High | 1.15 (0.90, 1.47) | 0.260 |
|  | Medium | 1.01 (0.79, 1.31) | 0.908 |
|  | Low | 1.34 (1.08, 1.67) | 0.008 |
| **Total anthocyanidins** | Participants without endometriosis |  |  |
|  | High | Reference |  |
|  | Medium | 0.93 (0.88, 0.98) | 0.007 |
|  | Low | 0.99 (0.94, 1.05) | 0.835 |
|  | Participants with endometriosis |  |  |
|  | High | 1.03 (0.81, 1.32) | 0.784 |
|  | Medium | 1.29 (1.02, 1.61) | 0.031 |
|  | Low | 1.06 (0.84, 1.35) | 0.617 |
| Cyanidin | Participants without endometriosis |  |  |
|  | High | Reference |  |
|  | Medium | 0.93 (0.88, 0.98) | 0.009 |
|  | Low | 1.00 (0.95, 1.06) | 0.968 |
|  | Participants with endometriosis |  |  |
|  | High | 1.02 (0.80, 1.29) | 0.880 |
|  | Medium | 1.23 (0.97, 1.56) | 0.093 |
|  | Low | 1.15 (0.91, 1.45) | 0.231 |
| Delphinidin | Participants without endometriosis |  |  |
|  | High | Reference |  |
|  | Medium | 0.99 (0.94, 1.04) | 0.685 |
|  | Low | 1.02 (0.97, 1.08) | 0.472 |
|  | Participants with endometriosis |  |  |
|  | High | 1.22 (0.97, 1.53) | 0.096 |
|  | Medium | 1.08 (0.85, 1.38) | 0.536 |
|  | Low | 1.17 (0.92, 1.48) | 0.193 |
| Malvidin | Participants without endometriosis |  |  |
|  | High | Reference |  |
|  | Medium | 0.97 (0.92, 1.03) | 0.308 |
|  | Low | 1.04 (0.98, 1.10) | 0.213 |
|  | Participants with endometriosis |  |  |
|  | High | 1.28 (1.01, 1.63) | 0.043 |
|  | Medium | 1.03 (0.80, 1.32) | 0.837 |
|  | Low | 1.17 (0.94, 1.46) | 0.167 |
| Pelargonidin | Participants without endometriosis |  |  |
|  | High | Reference |  |
|  | Medium | 0.96 (0.91, 1.02) | 0.167 |
|  | Low | 1.01 (0.96, 1.07) | 0.597 |
|  | Participants with endometriosis |  |  |
|  | High | 1.09 (0.86, 1.38) | 0.460 |
|  | Medium | 1.20 (0.95, 1.52) | 0.126 |
|  | Low | 1.14 (0.90, 1.45) | 0.283 |
| Peonidin | Participants without endometriosis |  |  |
|  | High | Reference |  |
|  | Medium | 0.95 (0.90, 1.00) | 0.065 |
|  | Low | 1.01 (0.95, 1.07) | 0.731 |
|  | Participants with endometriosis |  |  |
|  | High | 1.25 (0.99, 1.59) | 0.058 |
|  | Medium | 1.03 (0.81, 1.32) | 0.792 |
|  | Low | 1.13 (0.90, 1.43) | 0.299 |
| Petunidin | Participants without endometriosis |  |  |
|  | High | Reference |  |
|  | Medium | 0.96 (0.91, 1.02) | 0.156 |
|  | Low | 1.02 (0.97, 1.08) | 0.419 |
|  | Participants with endometriosis |  |  |
|  | High | 1.35 (1.07, 1.69) | 0.011 |
|  | Medium | 1.13 (0.89, 1.43) | 0.326 |
|  | Low | 0.99 (0.78, 1.27) | 0.966 |
| **Total flavanones** | Participants without endometriosis |  |  |
|  | High | Reference |  |
|  | Medium | 0.99 (0.94, 1.04) | 0.652 |
|  | Low | 1.10 (1.34, 1.16) | 0.001 |
|  | Participants with endometriosis |  |  |
|  | High | 1.07 (0.84, 1.38) | 0.573 |
|  | Medium | 1.10 (0.85, 1.42) | 0.471 |
|  | Low | 1.36 (1.10, 1.68) | 0.005 |
| Hesperetin | Participants without endometriosis |  |  |
|  | High | Reference |  |
|  | Medium | 1.01 (0.96, 1.07) | 0.691 |
|  | Low | 1.12 (1.06, 1.18) | <0.001 |
|  | Participants with endometriosis |  |  |
|  | High | 1.23 (0.96, 1.56) | 0.097 |
|  | Medium | 1.03 (0.80, 1.34) | 0.806 |
|  | Low | 1.33 (1.07, 1.64) | 0.010 |
| Naringenin | Participants without endometriosis |  |  |
|  | High | Reference |  |
|  | Medium | 0.98 (0.93, 1.04) | 0.495 |
|  | Low | 1.06 (1.00, 1.11) | 0.046 |
|  | Participants with endometriosis |  |  |
|  | High | 1.02 (0.79, 1.32) | 0.890 |
|  | Medium | 1.08 (0.84, 1.39) | 0.527 |
|  | Low | 1.38 (1.11, 1.70) | 0.003 |

Model was adjusted for age, Townsend deprivation index, race/ethnicity, education level of college, hypertension at baseline, diabetes at baseline, smoking status, alcohol consumption, physical activity, healthy diet score, age at menarche, oral contraceptive use, and hormone replacement therapy.

| **Table S13. Joint associations between endometriosis and flavonoid categories with CHD.** | | | |
| --- | --- | --- | --- |
| **Flavonoid/subclasses** | **Groups** | **HR (95% CI)** | ***P* valuevalue** |
| **Total flavonoid** | Participants without endometriosis |  |  |
|  | High |  |  |
|  | Medium | 0.91 (0.85, 0.99) | 0.024 |
|  | Low | 0.94 (0.87,1.01) | 0.095 |
|  | Participants with endometriosis |  |  |
|  | High | 1.20 (0.88, 1.65) | 0.247 |
|  | Medium | 1.12 (0.79, 1.59) | 0.52 |
|  | Low | 1.23 (0.90, 1.68) | 0.187 |
| **Total Flavan-3-ols** | Participants without endometriosis |  |  |
|  | High | Reference |  |
|  | Medium | 0.94 (0.87, 1.02) | 0.132 |
|  | Low | 0.94 (0.87, 1.02) | 0.151 |
|  | Participants with endometriosis |  |  |
|  | High | 1.17 (0.84, 1.61) | 0.353 |
|  | Medium | 1.17 (0.83, 1.65) | 0.359 |
|  | Low | 1.27 (0.93, 1.74) | 0.129 |
| (-)-Epicatechin | Participants without endometriosis |  |  |
|  | High | Reference |  |
|  | Medium | 0.91 (0.84, 0.99) | 0.020 |
|  | Low | 0.97 (0.90, 1.05) | 0.471 |
|  | Participants with endometriosis |  |  |
|  | High | 1.16 (0.84, 1.61) | 0.370 |
|  | Medium | 1.14 (0.81, 1.60) | 0.457 |
|  | Low | 1.30 (0.96, 1.78) | 0.091 |
| (-)-Epicatechin 3-gallate | Participants without endometriosis |  |  |
|  | High | Reference |  |
|  | Medium | 0.95 (0.88, 1.03) | 0.209 |
|  | Low | 0.94 (0.87, 1.02) | 0.142 |
|  | Participants with endometriosis |  |  |
|  | High | 1.21 (0.88, 1.66) | 0.231 |
|  | Medium | 1.09 (0.76, 1.56) | 0.633 |
|  | Low | 1.31 (0.96, 1.78) | 0.089 |
| (-)-Epigallocatechin | Participants without endometriosis |  |  |
|  | High | Reference |  |
|  | Medium | 0.93 (0.86, 1.00) | 0.065 |
|  | Low | 0.94 (0.87, 1.01) | 0.111 |
|  | Participants with endometriosis |  |  |
|  | High | 1.17 (0.85, 1.61) | 0.348 |
|  | Medium | 1.20 (0.86, 1.69) | 0.278 |
|  | Low | 1.22 (0.89, 1.67) | 0.218 |
| (-)-Epigallocatechin 3-gallate | Participants without endometriosis |  |  |
|  | High | Reference |  |
|  | Medium | 0.93 (0.86, 1.01) | 0.077 |
|  | Low | 0.93 (0.86, 1.01) | 0.074 |
|  | Participants with endometriosis |  |  |
|  | High | 1.25 (0.92, 1.70) | 0.161 |
|  | Medium | 1.02 (0.71, 1.48) | 0.903 |
|  | Low | 1.29 (0.95, 1.76) | 0.103 |
| (+)-Catechin | Participants without endometriosis |  |  |
|  | High | Reference |  |
|  | Medium | 0.95 (0.88, 1.03) | 0.220 |
|  | Low | 1.00 (0.92, 1.08) | 0.985 |
|  | Participants with endometriosis |  |  |
|  | High | 1.38 (1.01, 1.89) | 0.046 |
|  | Medium | 1.11 (0.79, 1.57) | 0.544 |
|  | Low | 1.21 (0.88, 1.66) | 0.243 |
| (+)-Gallocatechin | Participants without endometriosis |  |  |
|  | High | Reference |  |
|  | Medium | 0.92 (0.85, 0.99) | 0.027 |
|  | Low | 0.96 (0.88, 1.03) | 0.250 |
|  | Participants with endometriosis |  |  |
|  | High | 1.17 (0.85, 1.62) | 0.334 |
|  | Medium | 1.13 (0.80, 1.61) | 0.481 |
|  | Low | 1.28 (0.84, 1.73) | 0.114 |
| **Total flavonols** | Participants without endometriosis |  |  |
|  | High | Reference |  |
|  | Medium | 0.92 (0.85, 0.99) | 0.027 |
|  | Low | 0.88 (0.81, 0.95) | 0.001 |
|  | Participants with endometriosis |  |  |
|  | High | 1.24 (0.92, 1.67) | 0.166 |
|  | Medium | 0.88 (0.60, 1.29) | 0.521 |
|  | Low | 1.37 (1.01, 1.87） | 0.043 |
| Isorhamnetin | Participants without endometriosis |  |  |
|  | High | Reference |  |
|  | Medium | 0.97 (0.89, 1.05) | 0.388 |
|  | Low | 1.03 (0.95, 1.11) | 0.524 |
|  | Participants with endometriosis |  |  |
|  | High | 1.51 (1.12, 2.03) | 0.006 |
|  | Medium | 0.93 (0.64, 1.37) | 0.724 |
|  | Low | 1.29 (0.94, 1.76) | 0.119 |
| Kaempferol | Participants without endometriosis |  |  |
|  | High | Reference |  |
|  | Medium | 0.92 (0.85, 0.99) | 0.035 |
|  | Low | 0.93 (0.86, 1.01) | 0.086 |
|  | Participants with endometriosis |  |  |
|  | High | 1.22 (0.90, 1.67) | 0.203 |
|  | Medium | 1.09 (0.76, 1.55) | 0.646 |
|  | Low | 1.25 (0.91, 1.70) | 0.164 |
| Myricetin | Participants without endometriosis |  |  |
|  | High | Reference |  |
|  | Medium | 0.97 (0.90, 1.05) | 0.508 |
|  | Low | 0.89 (0.82, 0.96) | 0.003 |
|  | Participants with endometriosis |  |  |
|  | High | 1.37 (1.01, 1.85) | 0.041 |
|  | Medium | 1.00 (0.71, 1.42) | 0.993 |
|  | Low | 1.21 (0.87, 1.69) | 0.251 |
| Quercetin | Participants without endometriosis |  |  |
|  | High | Reference |  |
|  | Medium | 0.95 (0.88, 1.03) | 0.230 |
|  | Low | 0.92 (0.85, 0.99) | 0.031 |
|  | Participants with endometriosis |  |  |
|  | High | 1.18 (0.86, 1.61) | 0.310 |
|  | Medium | 1.15 (0.82, 1.61) | 0.404 |
|  | Low | 1.26 (0.92, 1.75) | 0.155 |
| **Total flavones** | Participants without endometriosis |  |  |
|  | High | Reference |  |
|  | Medium | 0.94 (0.87, 1.02) | 0.160 |
|  | Low | 1.03 (0.95, 1.11) | 0.468 |
|  | Participants with endometriosis |  |  |
|  | High | 1.16 (0.82, 1.64) | 0.400 |
|  | Medium | 1.41 (1.03, 1.92) | 0.031 |
|  | Low | 1.17 (0.85, 1.61) | 0.343 |
| Apigenin | Participants without endometriosis |  |  |
|  | High | Reference |  |
|  | Medium | 0.93 (0.86, 1.01) | 0.091 |
|  | Low | 0.96 (0.89, 1.04) | 0.310 |
|  | Participants with endometriosis |  |  |
|  | High | 1.02 (0.72, 1.46) | 0.900 |
|  | Medium | 1.48 (1.10, 1.99) | 0.010 |
|  | Low | 1.13 (0.81, 1.57) | 0.472 |
| Luteolin | Participants without endometriosis |  |  |
|  | High | Reference |  |
|  | Medium | 1.02 (0.94, 1.10) | 0.624 |
|  | Low | 1.04 (0.96, 1.12) | 0.348 |
|  | Participants with endometriosis |  |  |
|  | High | 1.28 (0.91, 1.79) | 0.154 |
|  | Medium | 1.29 (0.93, 1.78) | 0.126 |
|  | Low | 1.27 (0.92, 1.74) | 0.144 |
| **Total anthocyanidins** | Participants without endometriosis |  |  |
|  | High | Reference |  |
|  | Medium | 0.95 (0.88, 1.03) | 0.205 |
|  | Low | 1.01 (0.94, 1.10) | 0.745 |
|  | Participants with endometriosis |  |  |
|  | High | 1.29 (0.93, 1.77) | 0.123 |
|  | Medium | 1.36 (0.99, 1.87) | 0.059 |
|  | Low | 1.08 (0.77, 1.52) | 0.647 |
| Cyanidin | Participants without endometriosis |  |  |
|  | High | Reference |  |
|  | Medium | 0.94 (0.87, 1.02) | 0.128 |
|  | Low | 1.00 (0.93, 1.08) | 0.978 |
|  | Participants with endometriosis |  |  |
|  | High | 1.25 (0.91, 1.71) | 0.171 |
|  | Medium | 1.12 (0.79, 1.60) | 0.524 |
|  | Low | 1.30 (0.96, 1.77) | 0.095 |
| Delphinidin | Participants without endometriosis |  |  |
|  | High | Reference |  |
|  | Medium | 0.97 (0.90, 1.05) | 0.510 |
|  | Low | 1.24 (0.89, 1.72) | 0.494 |
|  | Participants with endometriosis |  |  |
|  | High | 1.46 (1.08, 1.97) | 0.014 |
|  | Medium | 1.24 (0.90, 1.05) | 0.199 |
|  | Low | 1.06 (0.75, 1.51) | 0.740 |
| Malvidin | Participants without endometriosis |  |  |
|  | High | Reference |  |
|  | Medium | 1.00 (0.92, 1.08) | 0.944 |
|  | Low | 1.09 (1.01, 1.19) | 0.036 |
|  | Participants with endometriosis |  |  |
|  | High | 1.53 (1.11, 2.11) | 0.010 |
|  | Medium | 1.05 (0.73, 1.51) | 0.811 |
|  | Low | 1.33 (0.99. 1.80) | 0.063 |
| Pelargonidin | Participants without endometriosis |  |  |
|  | High | Reference |  |
|  | Medium | 0.96 (0.89, 1.04) | 0.289 |
|  | Low | 1.04 (0.96, 1.12) | 0.367 |
|  | Participants with endometriosis |  |  |
|  | High | 1.32 (0.97, 1.80) | 0.074 |
|  | Medium | 1.32 (0.95, 1.82) | 0.093 |
|  | Low | 1.11 (0.78, 1.56) | 0.570 |
| Peonidin | Participants without endometriosis |  |  |
|  | High | Reference |  |
|  | Medium | 0.99 (0.91, 1.08) | 0.845 |
|  | Low | 1.08 (0.99, 1.17) | 0.078 |
|  | Participants with endometriosis |  |  |
|  | High | 1.44 (1.04, 1.99) | 0.027 |
|  | Medium | 1.14 (0.81, 1.61) | 0.453 |
|  | Low | 1.29 (0.94, 1.76) | 0.116 |
| Petunidin | Participants without endometriosis |  |  |
|  | High | Reference |  |
|  | Medium | 1.01 (0.93, 1.10) | 0.797 |
|  | Low | 1.06 (0.98, 1.15) | 0.142 |
|  | Participants with endometriosis |  |  |
|  | High | 1.59 (1.17, 2.16) | 0.003 |
|  | Medium | 1.24 (0.89, 1.74) | 0.197 |
|  | Low | 1.07 (0.77, 1.50) | 0.684 |
| **Total flavanones** | Participants without endometriosis |  |  |
|  | High | Reference |  |
|  | Medium | 1.00 (0.93, 1.09) | 0.953 |
|  | Low | 1.11 (1.03, 1.20) | 0.009 |
|  | Participants with endometriosis |  |  |
|  | High | 1.05 (0.73, 1.52) | 0.784 |
|  | Medium | 1.8 (0.91, 1.80) | 0.161 |
|  | Low | 1.53 (1.15, 2.04) | 0.003 |
| Hesperetin | Participants without endometriosis |  |  |
|  | High | Reference |  |
|  | Medium | 1.03 (0.95, 1.12) | 0.417 |
|  | Low | 1.14 (1.05, 1.23) | 0.002 |
|  | Participants with endometriosis |  |  |
|  | High | 1.28 (0.90, 1.80) | 0.169 |
|  | Medium | 1.15 (0.81, 1.65) | 0.440 |
|  | Low | 1.51 (1.13, 2.01) | 0.005 |
| Naringenin | Participants without endometriosis |  |  |
|  | High | Reference |  |
|  | Medium | 1.01 (0.93, 1.09) | 0.833 |
|  | Low | 1.09 (1.01, 1.18) | 0.032 |
|  | Participants with endometriosis |  |  |
|  | High | 1.06 (0.73, 1.53) | 0.769 |
|  | Medium | 1.15 (0.81, 1.64) | 0.434 |
|  | Low | 1.62 (1.23, 2.15) | 0.001 |

Model was adjusted for age, Townsend deprivation index, race/ethnicity, education level of college, hypertension at baseline, diabetes at baseline, smoking status, alcohol consumption, physical activity, healthy diet score, age at menarche, oral contraceptive use, and hormone replacement therapy.

**References**

[1] M. Goodman, R.M. Bostick, C. Dash, W.D. Flanders, J.S. Mandel, Hypothesis: oxidative stress score as a combined measure of pro-oxidant and antioxidant exposures, Annals of epidemiology 17(5) (2007) 394-9.

[2] S.Y. Kong, M. Goodman, S. Judd, R.M. Bostick, W.D. Flanders, W. McClellan, Oxidative balance score as predictor of all-cause, cancer, and noncancer mortality in a biracial US cohort, Annals of epidemiology 25(4) (2015) 256-262.e1.

[3] L. Cheng, X. Wang, K. Dang, J. Hu, J. Zhang, X. Xu, S. Pan, X. Qi, Y. Li, Association of oxidative balance score with incident cardiovascular disease in patients with type 2 diabetes: findings of the UK Biobank study, European journal of nutrition 64(3) (2025) 110.

[4] C. Dash, R.M. Bostick, M. Goodman, W.D. Flanders, R. Patel, R. Shah, P.T. Campbell, M.L. McCullough, Oxidative balance scores and risk of incident colorectal cancer in a US prospective cohort study, American journal of epidemiology 181(8) (2015) 584-94.
